# Supplementary material for: Synthesis of aza and carbocyclic β-carbolines for the treatment of alcohol abuse. Regiospecific solution to the problem of 3,6-disubstituted β- and aza-β-carboline specificity
Source: Royal Society of Chemistry journal article supplement (doi:10.1039/c5ob01572c), 2015-01-01
Supplement: c5ob01572c1.pdf [file c5ob01572c1.pdf]

## Supporting Information

### Synthesis of Aza and Carbocyclic $\beta$ -Carbolines for the Treatment of Alcohol Abuse. Regiospecific Solution to The Problem of 3,6- Disubstituted $\beta$ - and Aza- $\beta$ -carboline Specificity

V. V. N. Phani Babu Tiruveedhula,<sup>a</sup> Kashi Reddy Methuku,<sup>a</sup> Jeffrey R.  
Deschamps,<sup>b</sup> and James M. Cook<sup>a,\*</sup>

<sup>a</sup> Department of Chemistry & Biochemistry, University of Wisconsin-Milwaukee,  
Milwaukee, WI 53201

<sup>b</sup> Center for Biomolecular Science and Engineering, Naval Research Laboratory,  
Code 6930, Washington, D. C 20375, USA

---

\*To whom correspondence should be addressed. Tel: 414-229-5856; Fax: 414-229-5530;

**E-mail:** capncook@uwm.edu

## Table of Contents

|                                                                                     |     |
|-------------------------------------------------------------------------------------|-----|
| 1) Copies of $^1\text{H}$ and $^{13}\text{C}$ NMR Spectra.....                      | S3  |
| 2) X-ray Structure Analysis for <b>2</b> , <b>3</b> , <b>9a</b> and <b>9d</b> ..... | S45 |

# Copies of $^1\text{H}$ and $^{13}\text{C}$ NMR Spectra

## *N*-(2-chlorophenyl)-6-propoxy-pyridin-3-amine

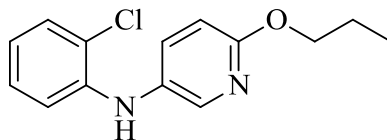

**7a**

$^1\text{H}$  NMR (300 MHz,  $\text{CDCl}_3$ )

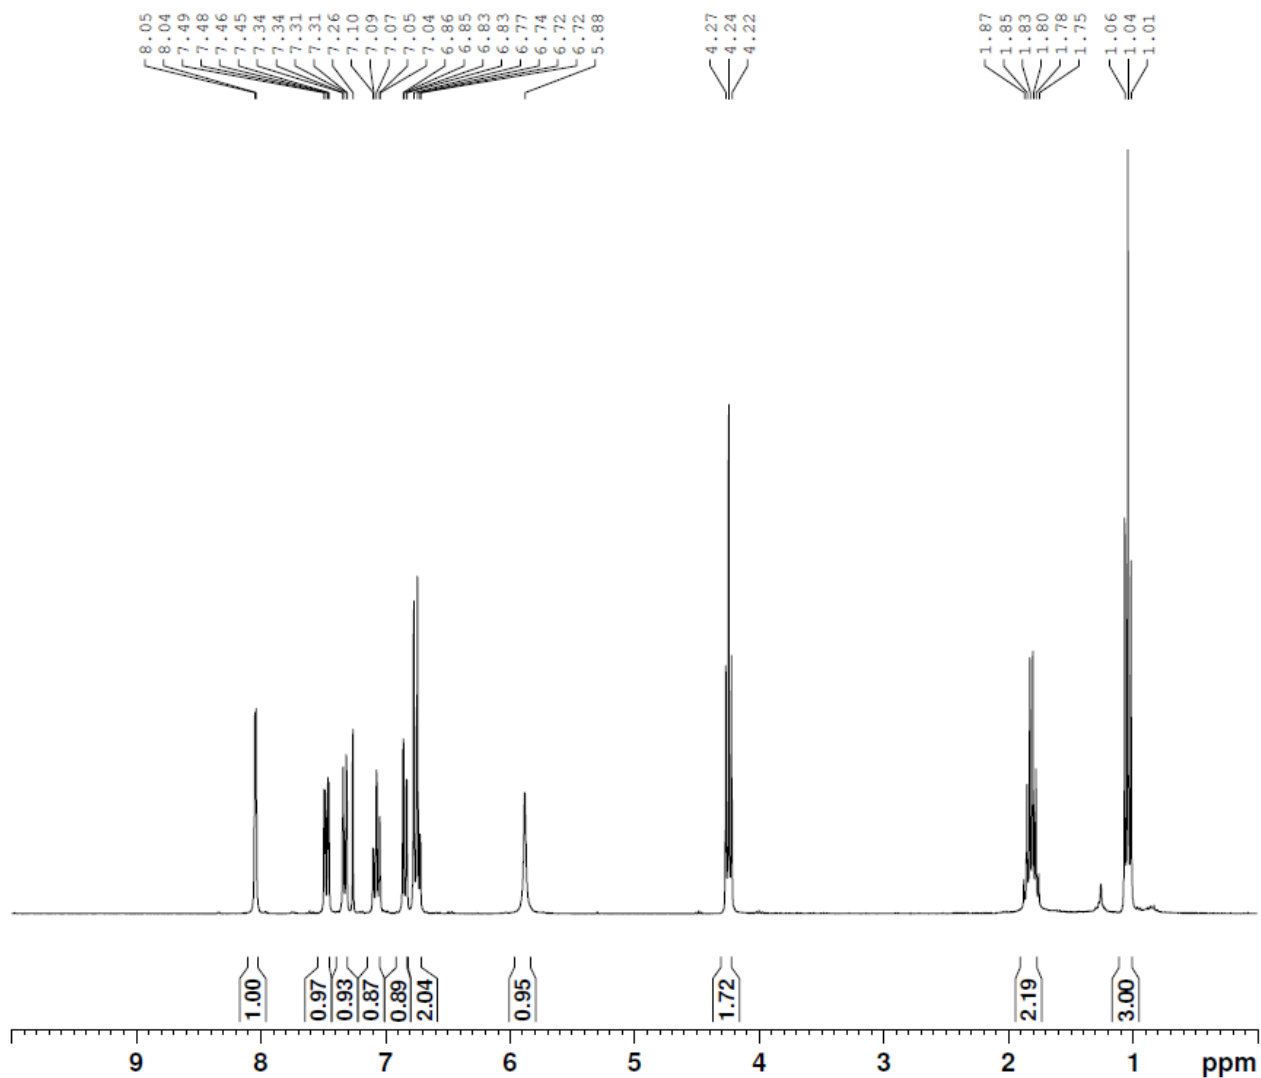

***N*-(2-chlorophenyl)-6-propoxypyridin-3-amine**

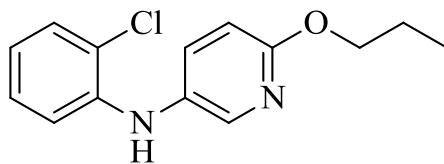

**7a**

<sup>13</sup>C NMR (75 MHz, CDCl<sub>3</sub>)

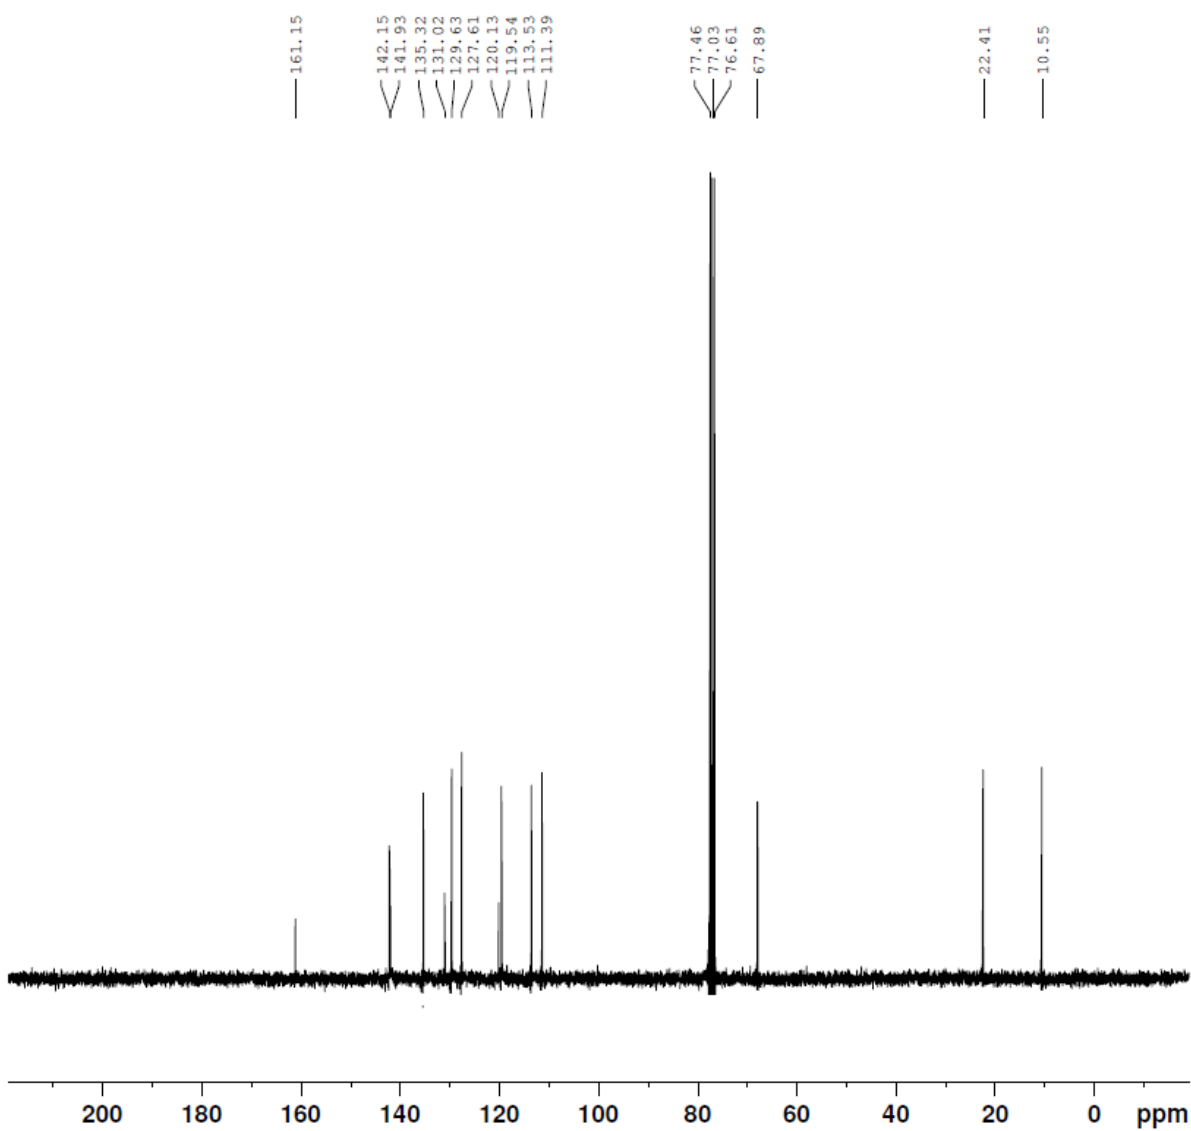

***N*-(2-chlorophenyl)-6-isopropoxy-pyridin-3-amine**

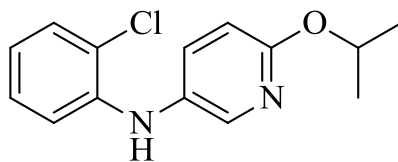

**7b**

<sup>1</sup>H NMR (300 MHz, CDCl<sub>3</sub>)

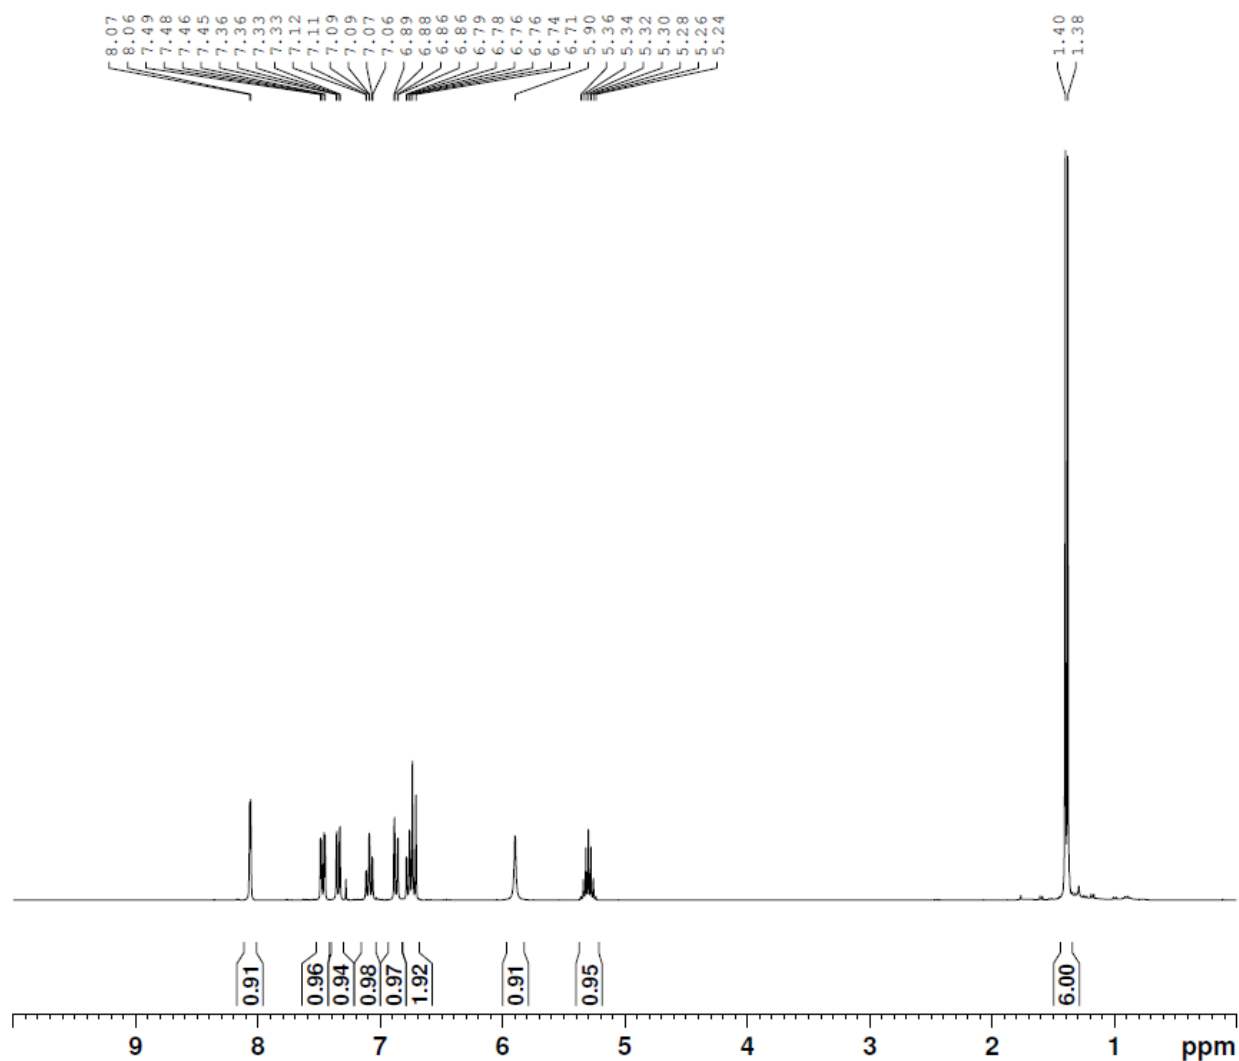

***N*-(2-chlorophenyl)-6-isopropoxy-pyridin-3-amine**

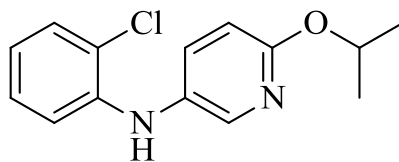

**7b**

$^{13}\text{C}$  NMR (75 MHz,  $\text{CDCl}_3$ )

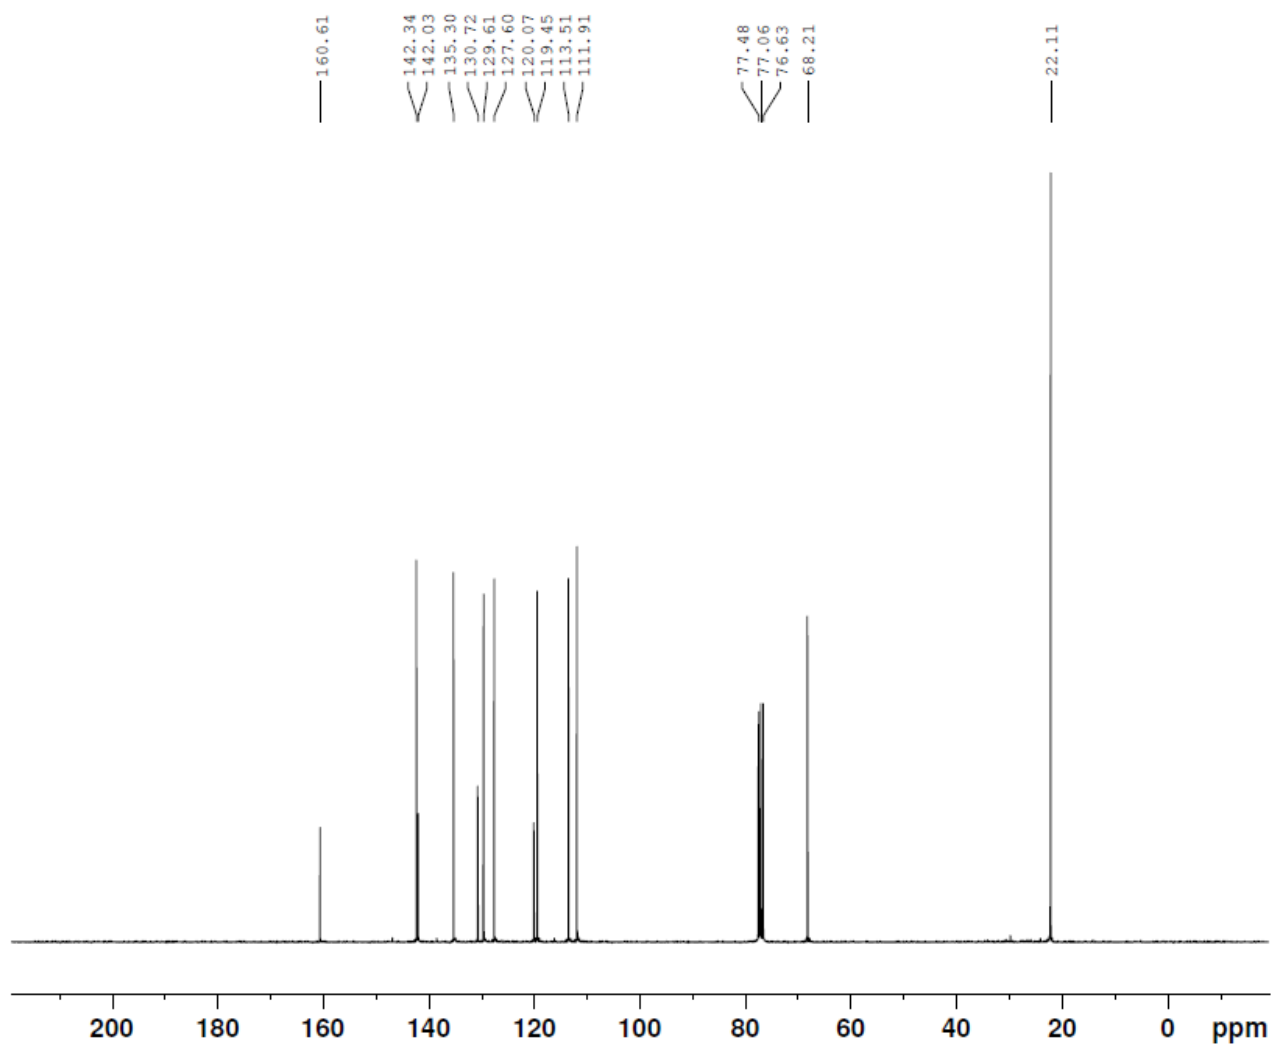

***tert*-butyl 5-((2-chlorophenyl)amino)picolinate**

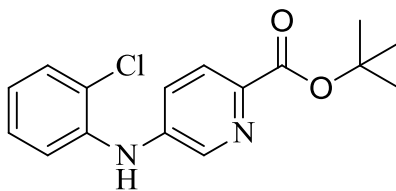

**7c**

$^1\text{H NMR}$  (300 MHz,  $\text{CDCl}_3$ )

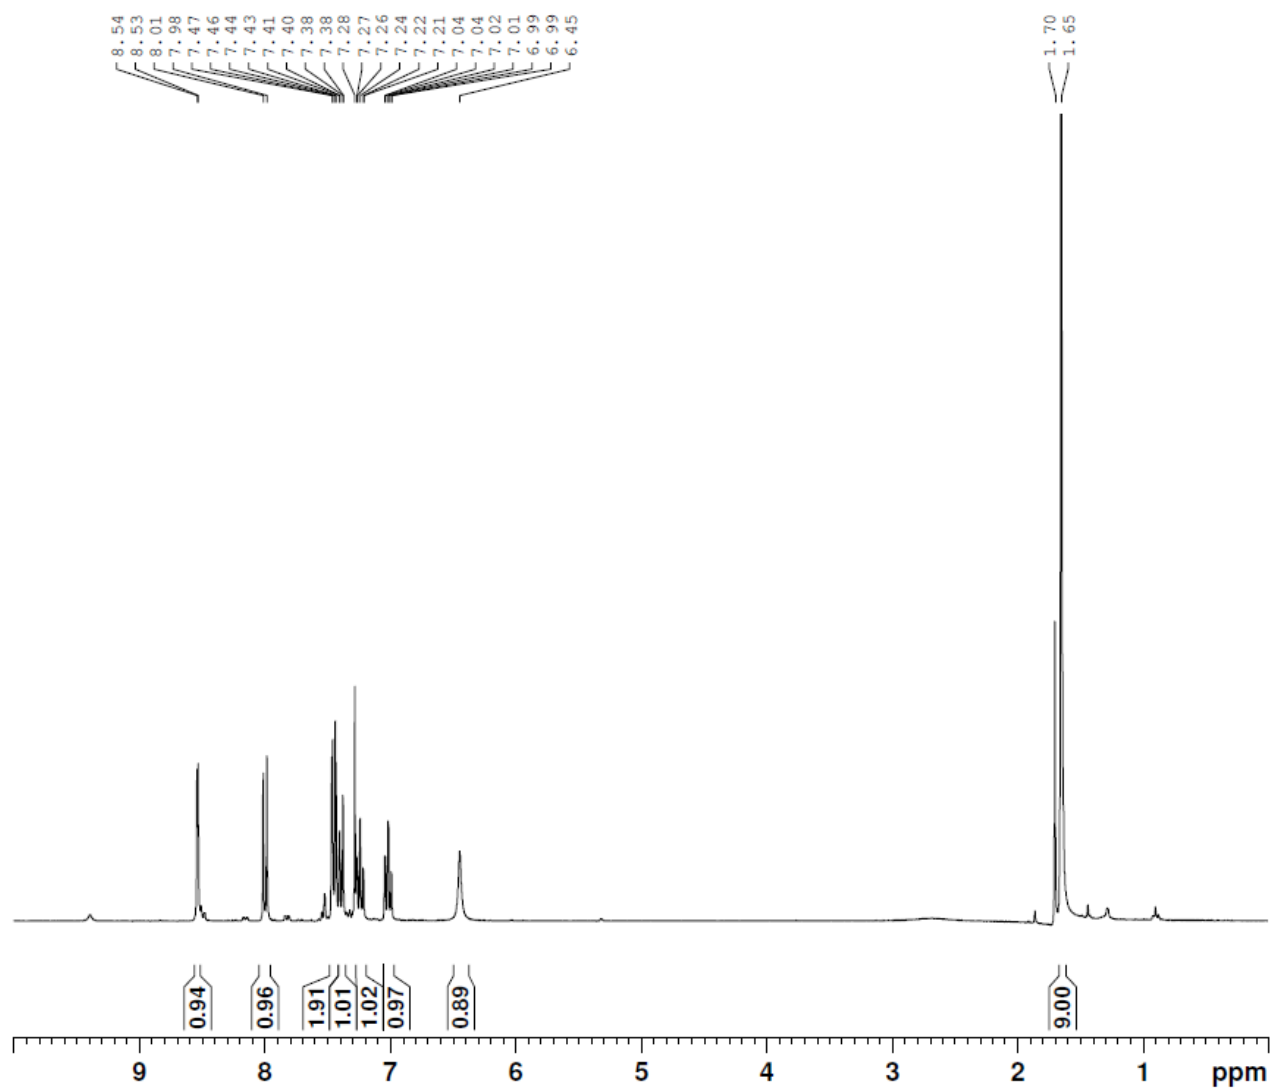

***tert*-butyl 5-((2-chlorophenyl)amino)picolinate**

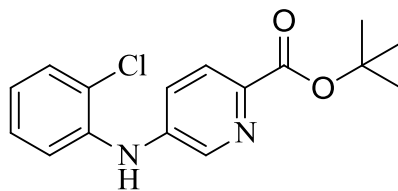

**7c**

$^{13}\text{C}$  NMR (75 MHz,  $\text{CDCl}_3$ )

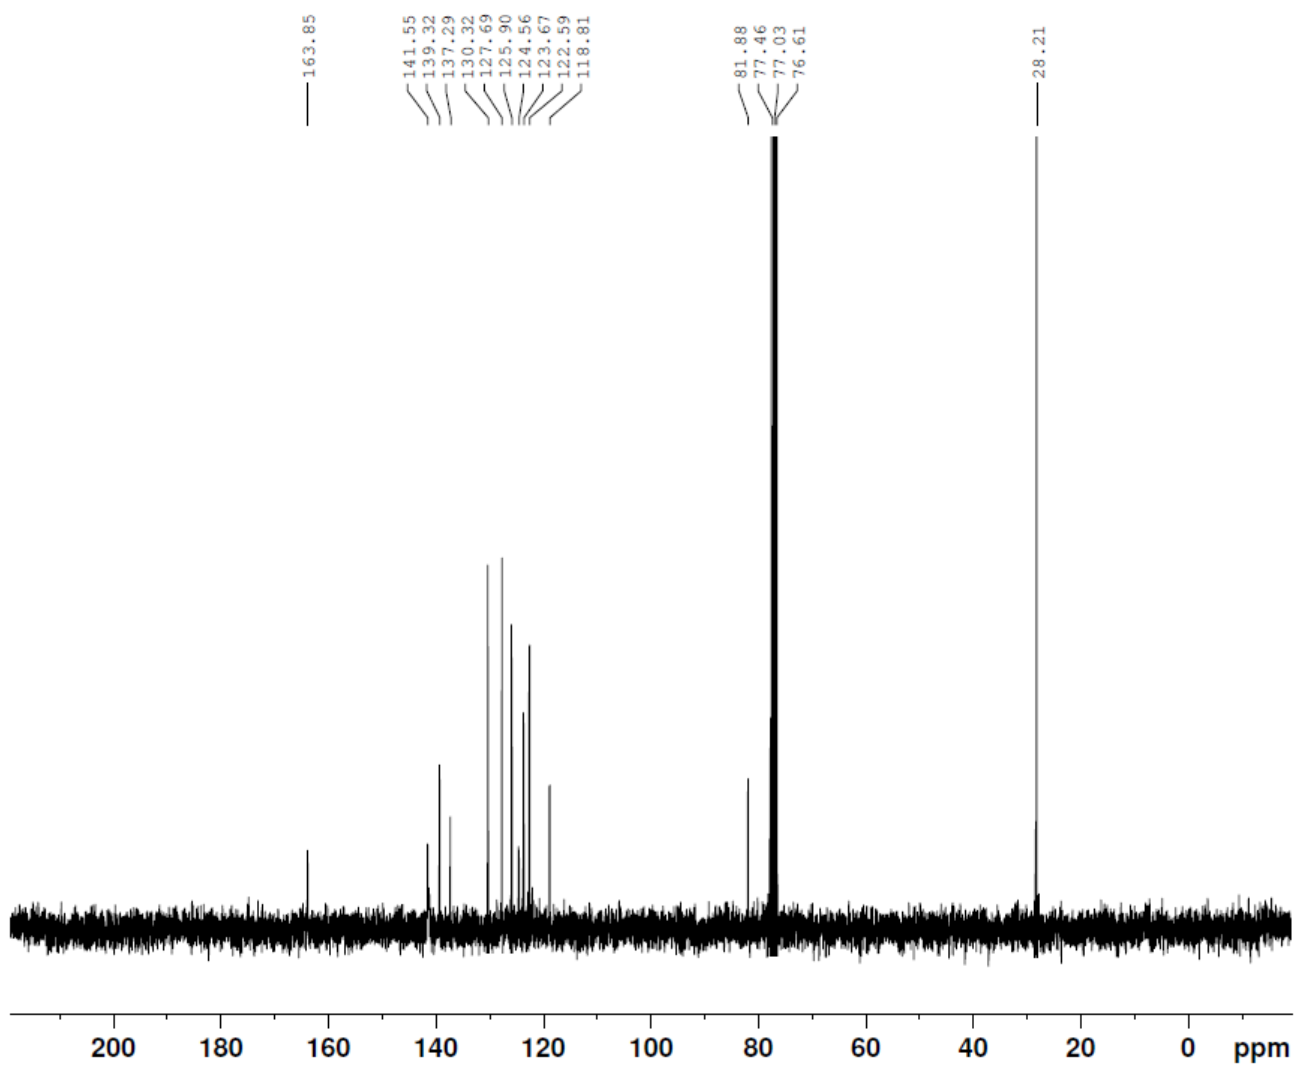



***N*-(3-chloropyridin-4-yl)-6-propoxy-pyridin-3-amine**

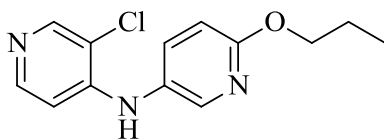

**7d**

$^1\text{H}$  NMR (300 MHz,  $\text{CDCl}_3$ )

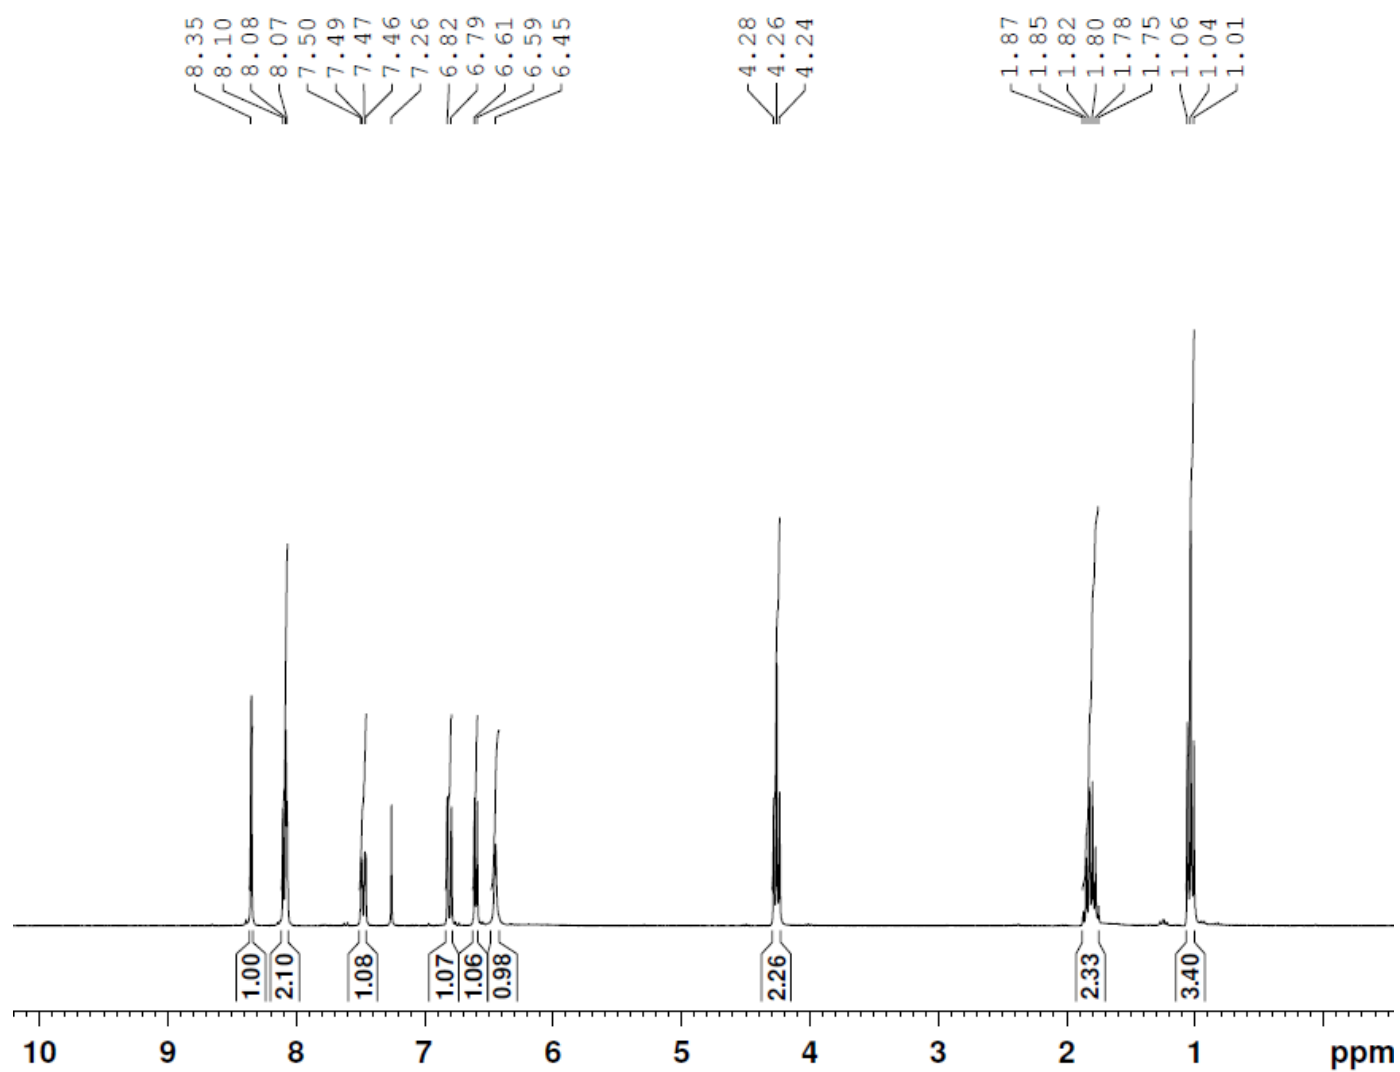

***N*-(3-chloropyridin-4-yl)-6-propoxypyridin-3-amine**

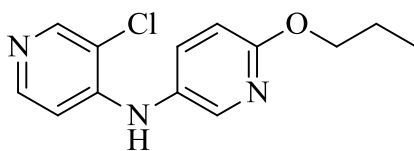

**7d**

$^{13}\text{C}$  NMR (75 MHz,  $\text{CDCl}_3$ )

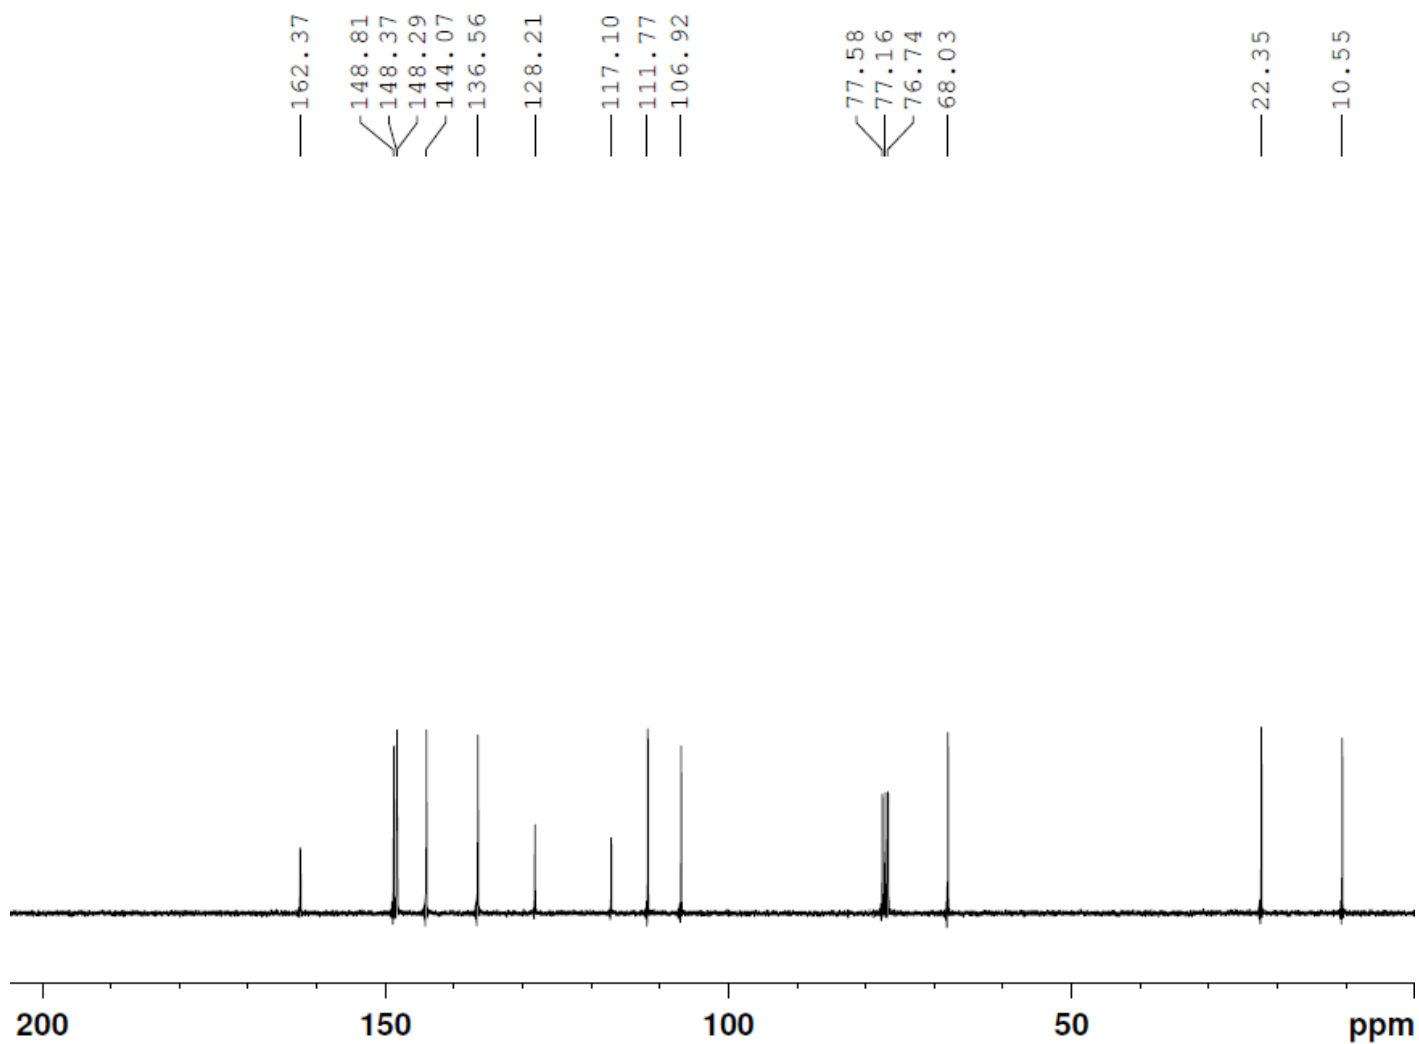

***N*-(3-chloropyridin-4-yl)-6-isopropoxy-pyridin-3-amine**

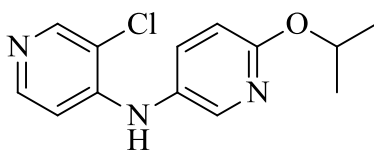

**7e**

<sup>1</sup>H NMR (300 MHz, CDCl<sub>3</sub>)

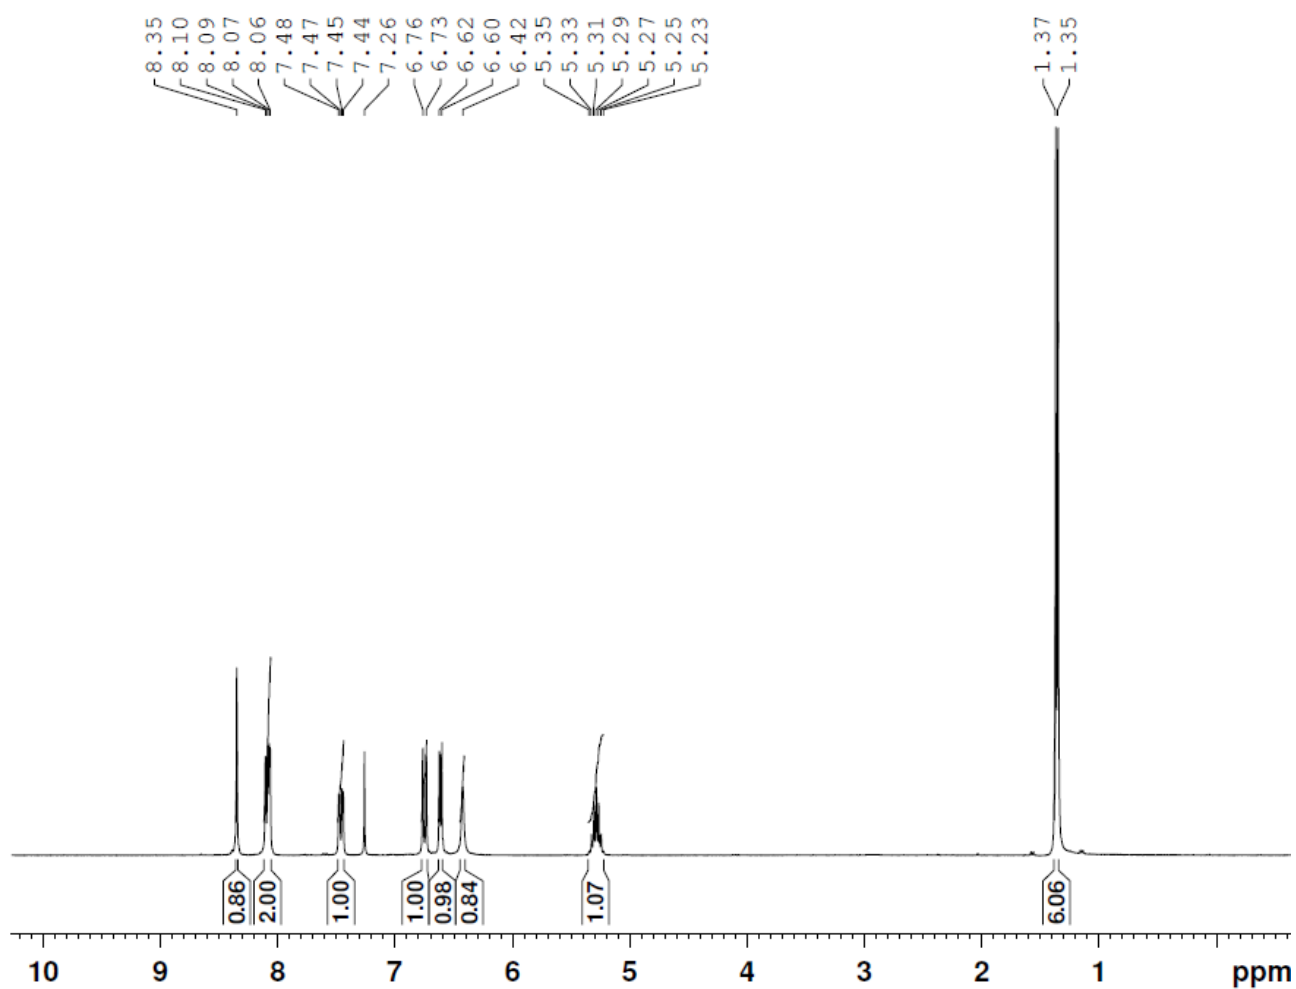

***N*-(3-chloropyridin-4-yl)-6-isopropoxy-pyridin-3-amine**

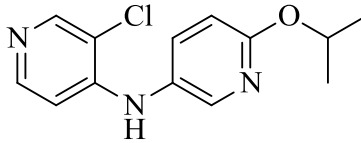

**7e**

$^{13}\text{C}$  NMR (75 MHz,  $\text{CDCl}_3$ )

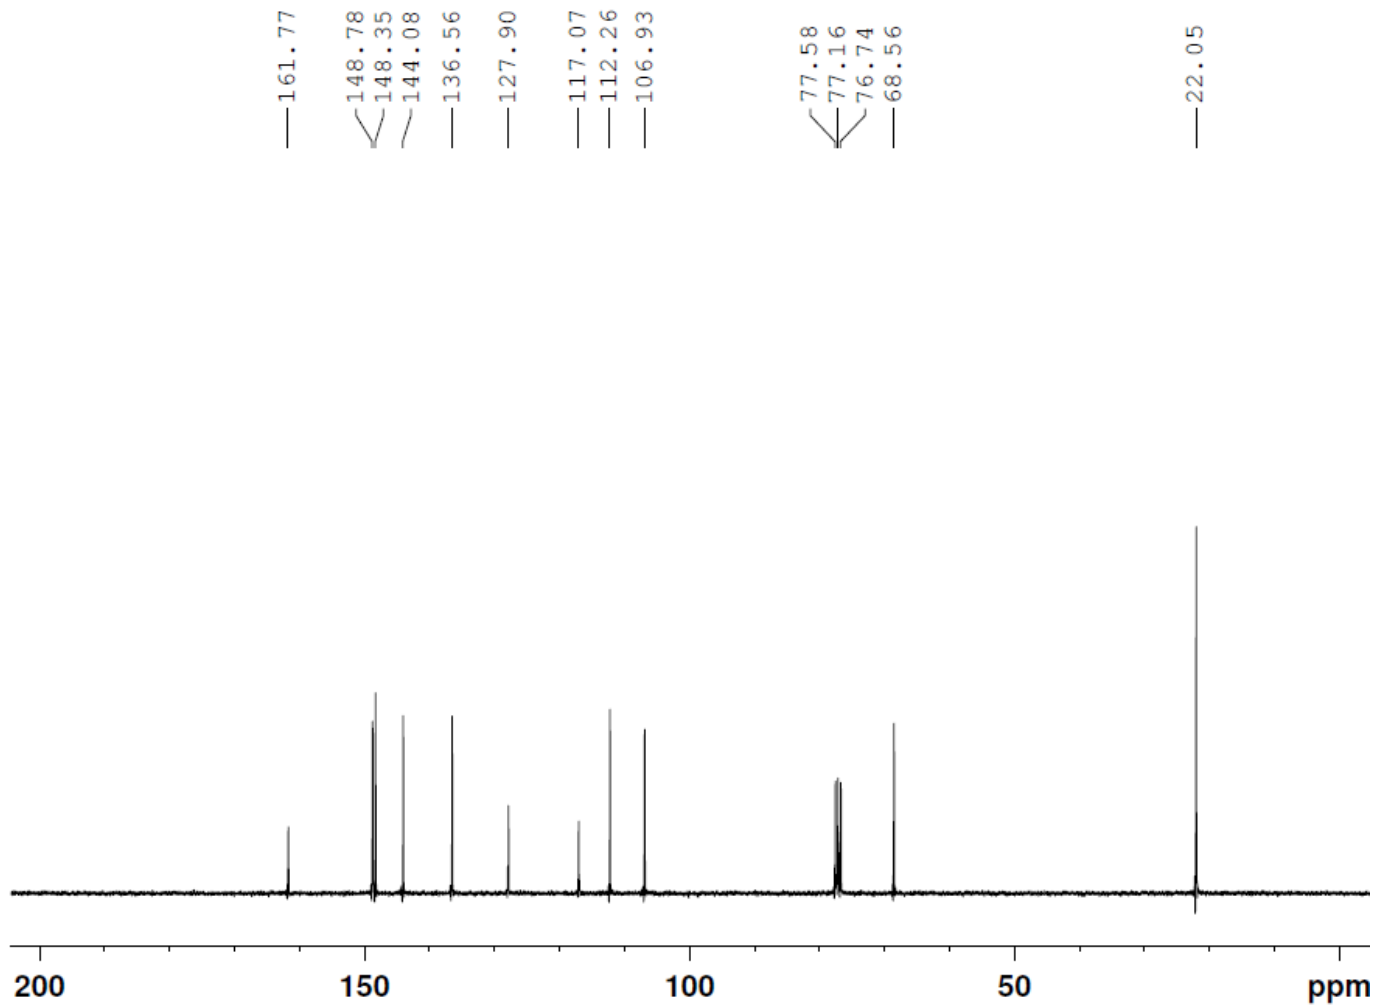

**3-propoxy-9H-pyrido[3,4-b]indole**

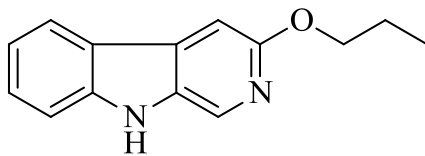

**3-PBC (1)**

$^1\text{H}$  NMR (300 MHz,  $\text{CDCl}_3$ )

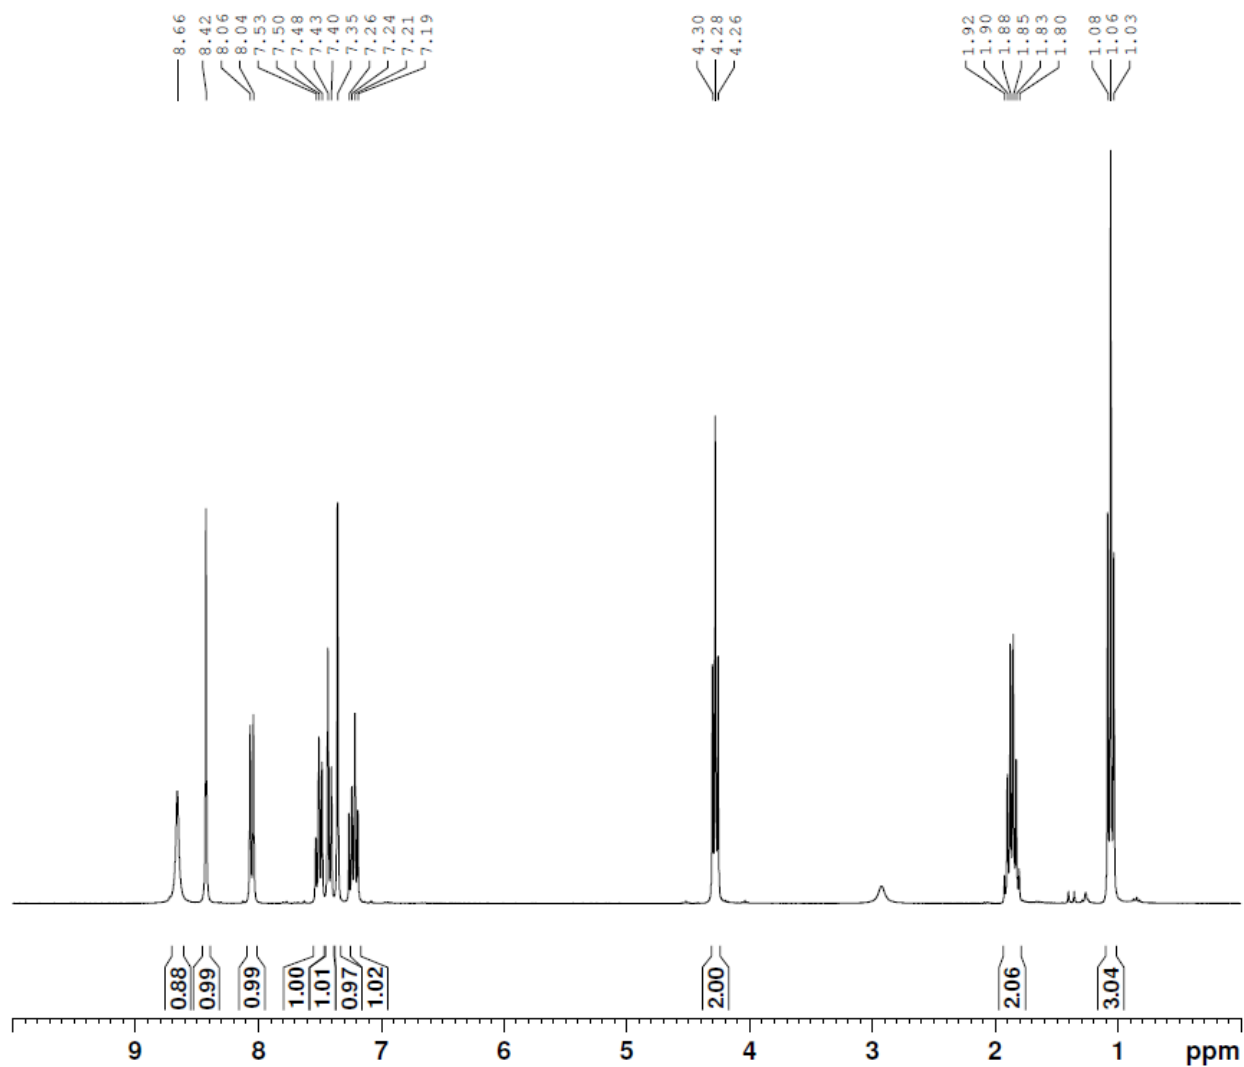

### 3-propoxy-9H-pyrido[3,4-b]indole

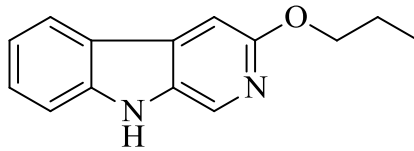

#### 3-PBC (1)

$^{13}\text{C}$  NMR (75 MHz,  $\text{CDCl}_3$ )

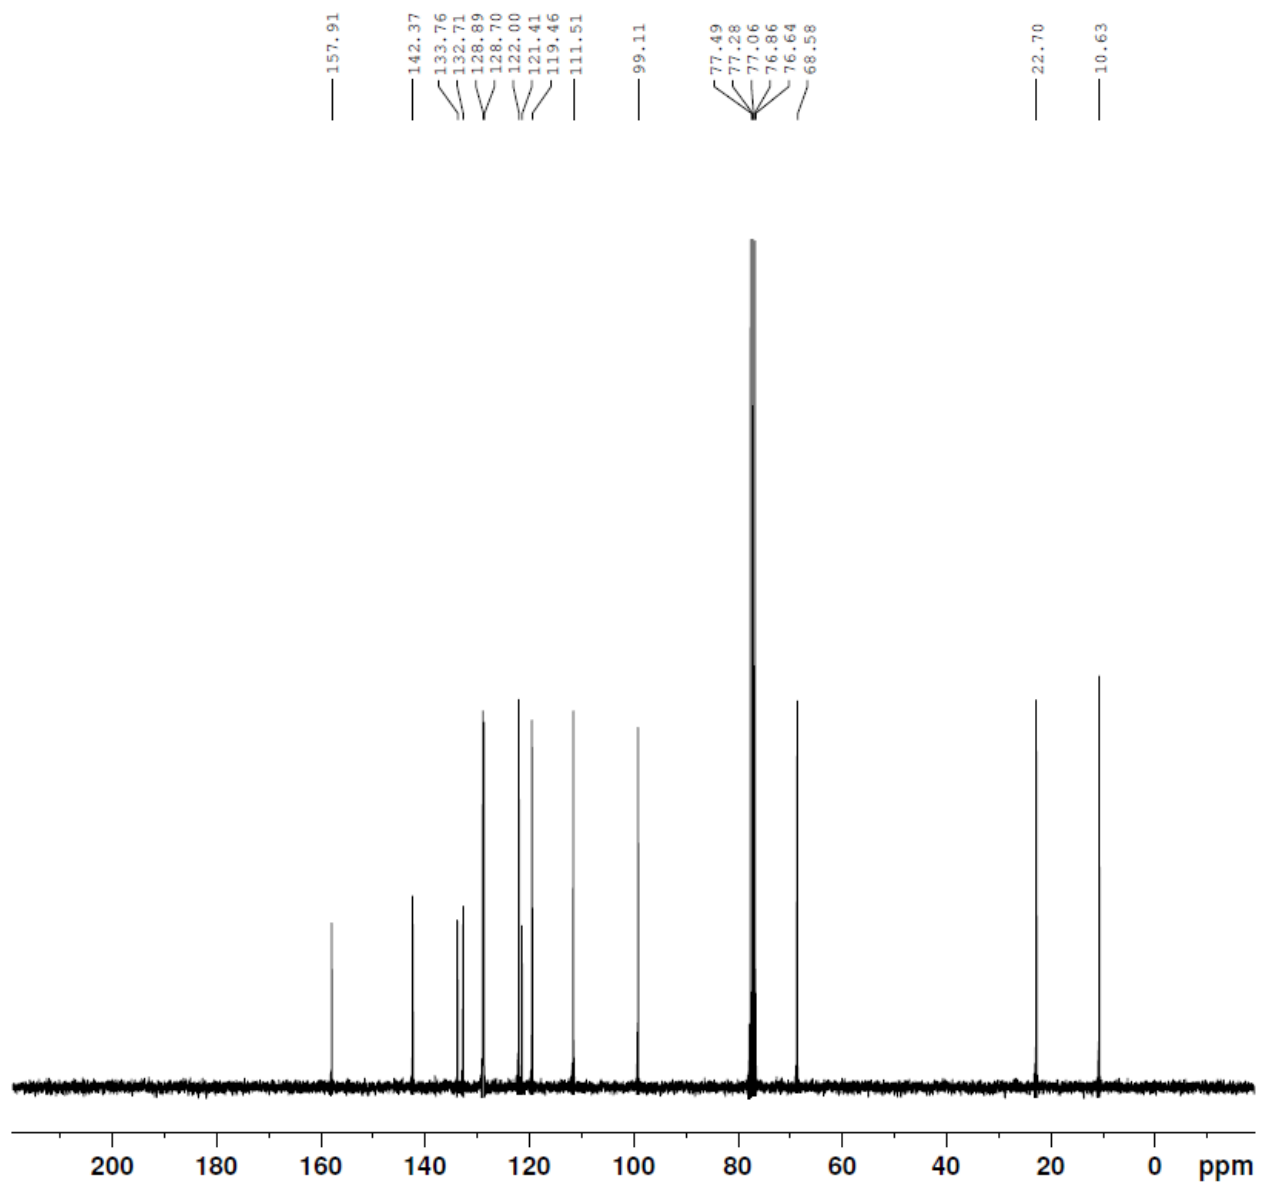

2-propoxy-5H-pyrido[3,2-b]indole

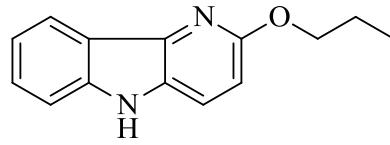

9a

$^1\text{H}$  NMR (300 MHz,  $\text{CDCl}_3$ )

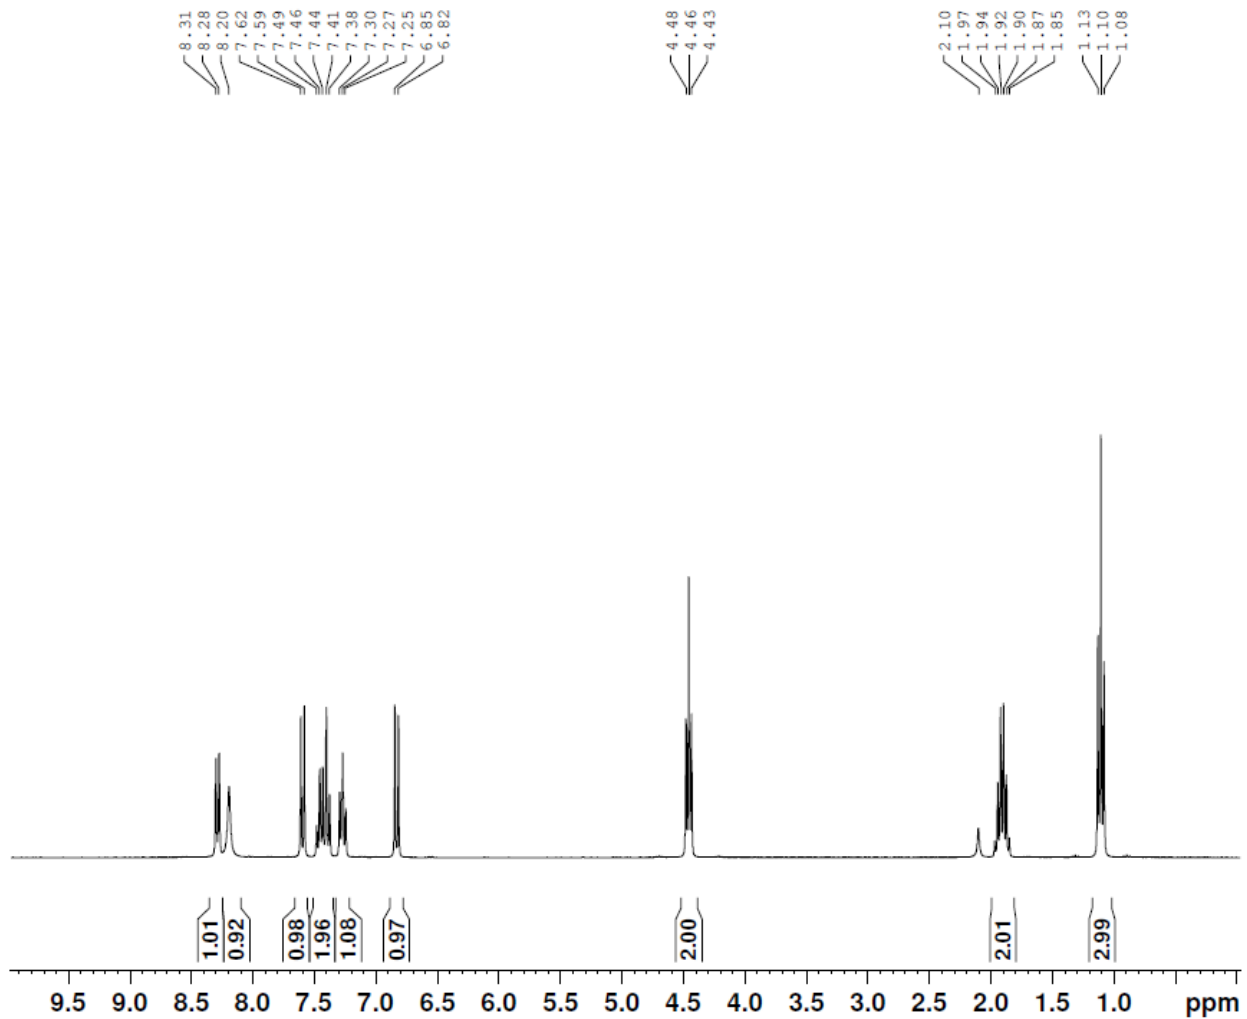

**2-propoxy-5H-pyrido[3,2-b]indole**

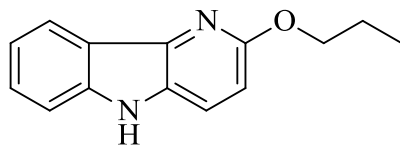

**9a**

$^{13}\text{C}$  NMR (75 MHz,  $\text{CDCl}_3$ )

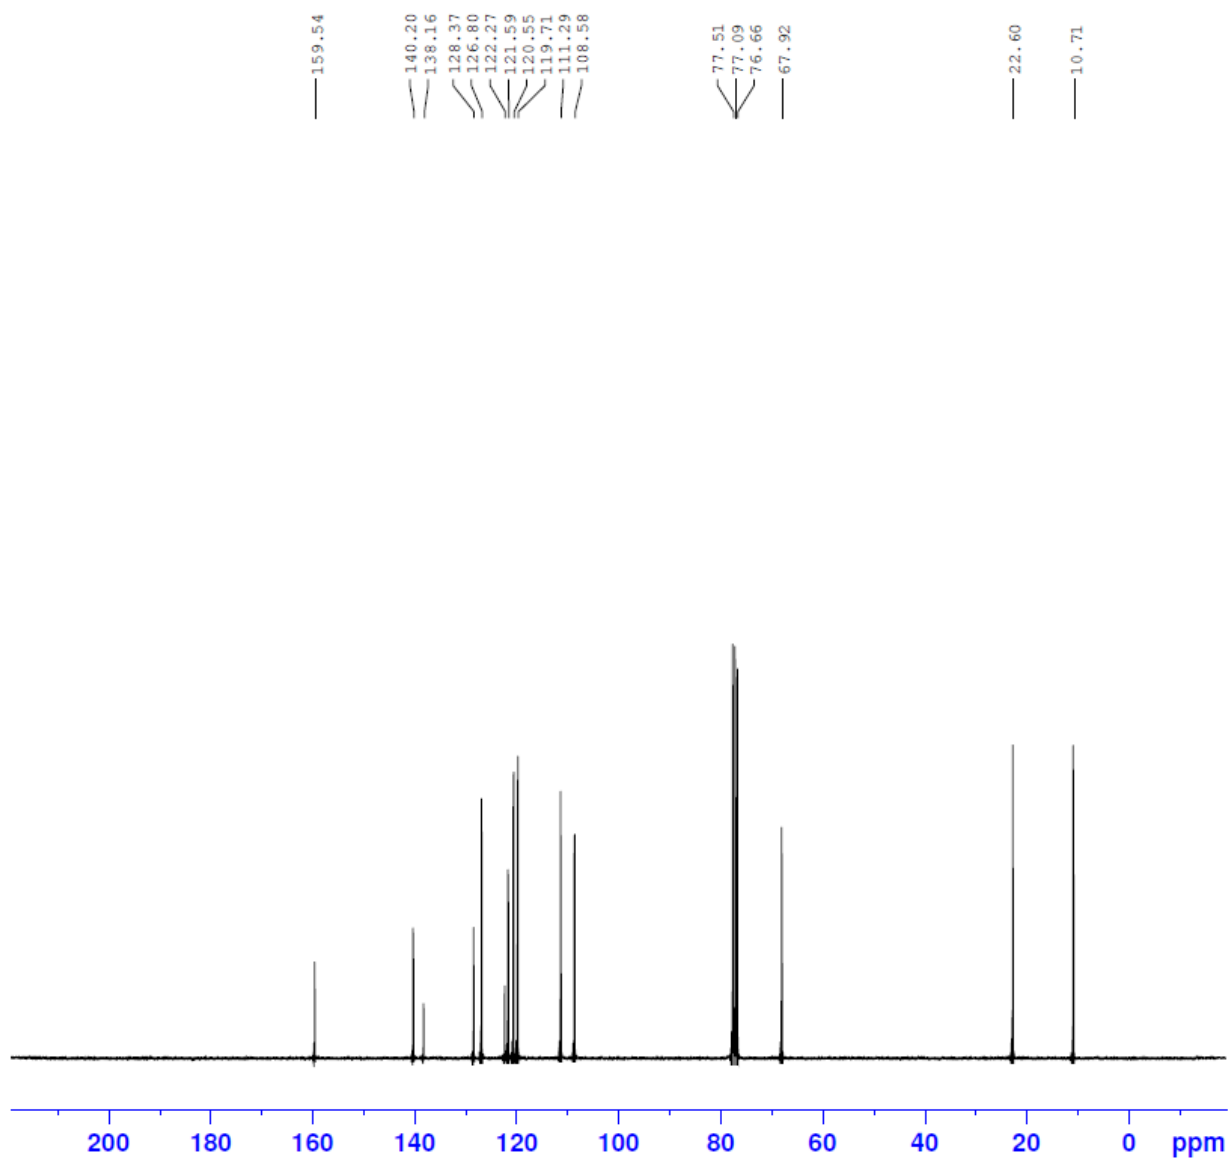



**3-isopropoxy-9H-pyrido[3,4-b]indole**

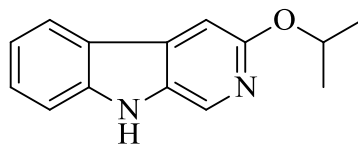

**3-ISOPBC (2)**

$^1\text{H}$  NMR (300 MHz,  $\text{CDCl}_3$ )

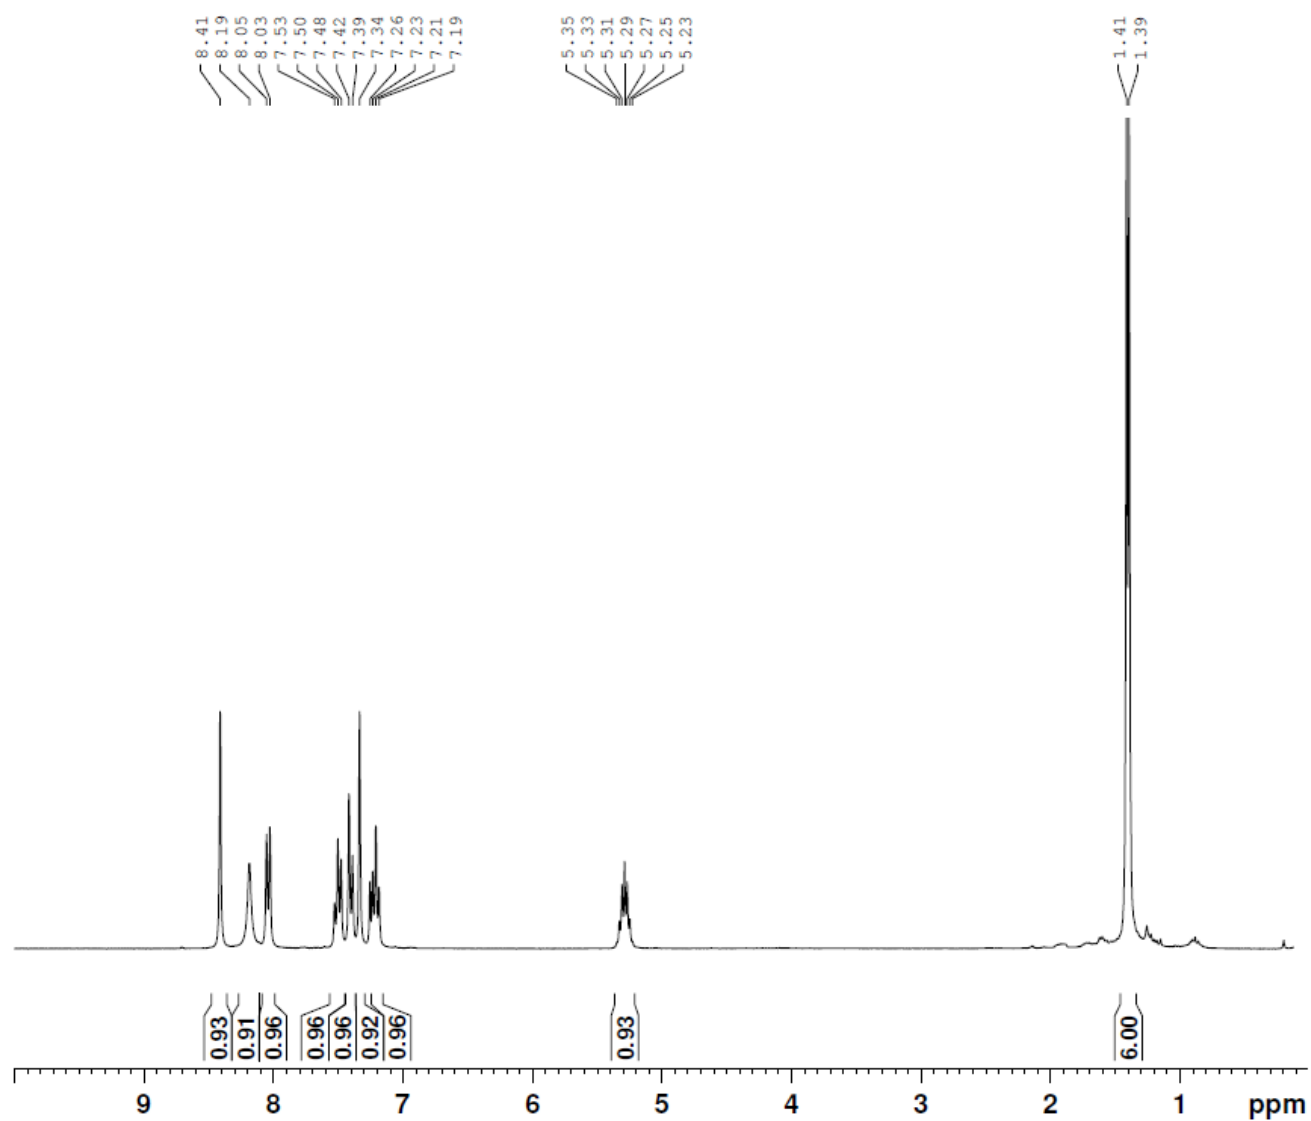

### 3-isopropoxy-9*H*-pyrido[3,4-*b*]indole

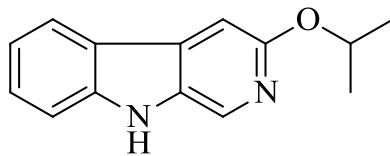

#### 3-ISOPBC (2)

$^{13}\text{C}$  NMR (75 MHz,  $\text{CDCl}_3$ )

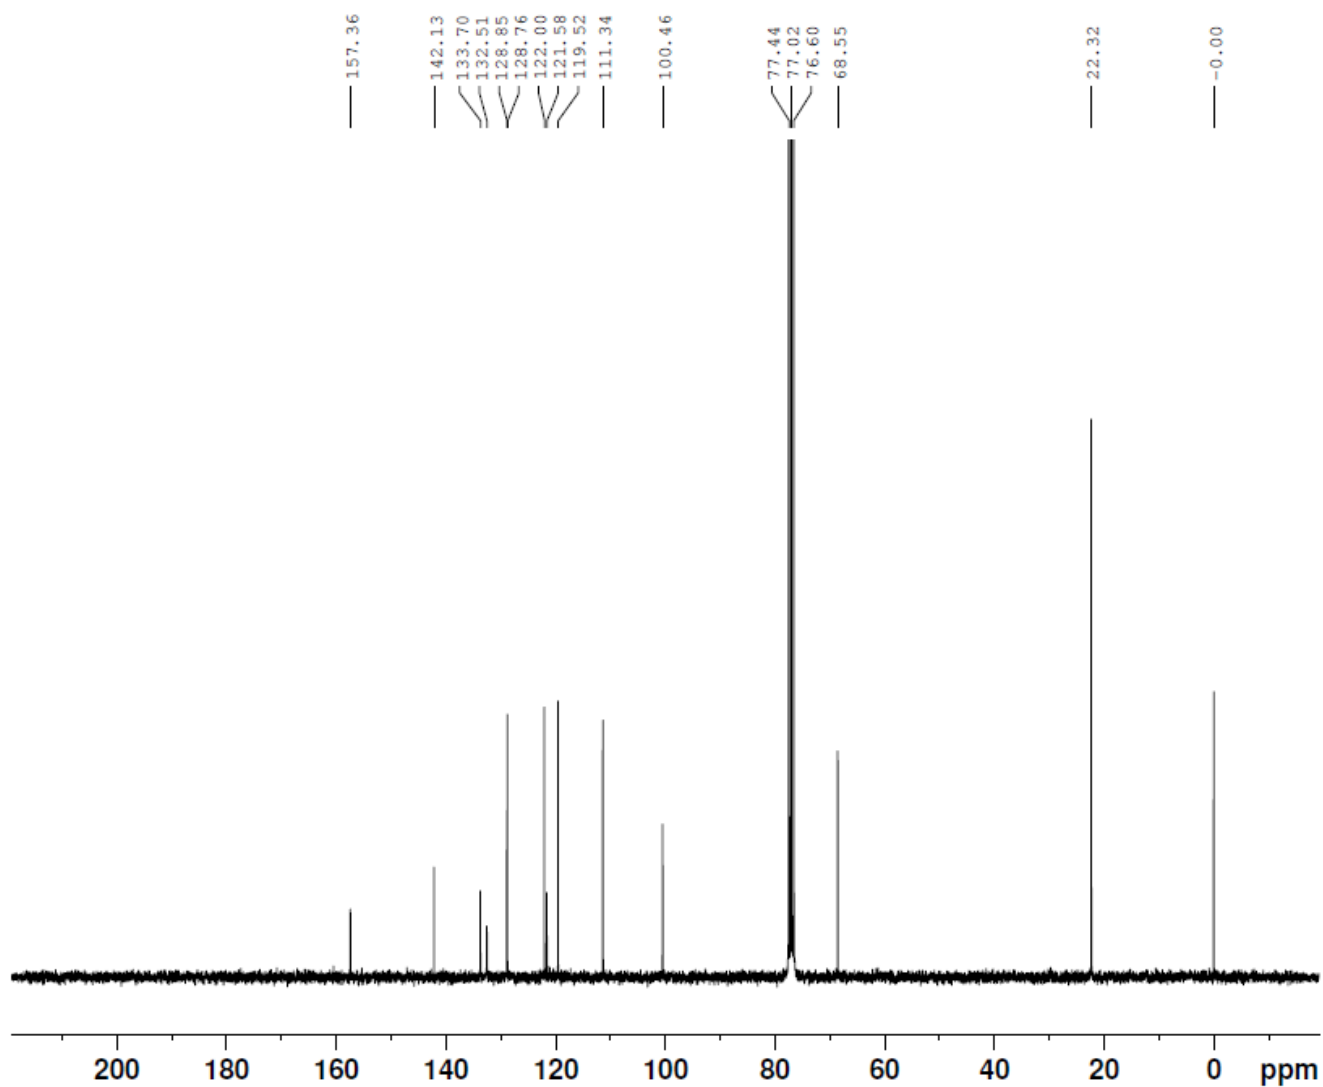

**2-isopropoxy-5H-pyrido[3,2-b]indole**

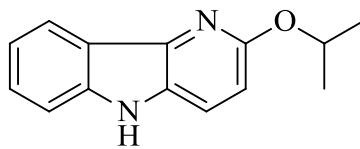

**9b**

$^1\text{H}$  NMR (300 MHz,  $\text{CDCl}_3$ )

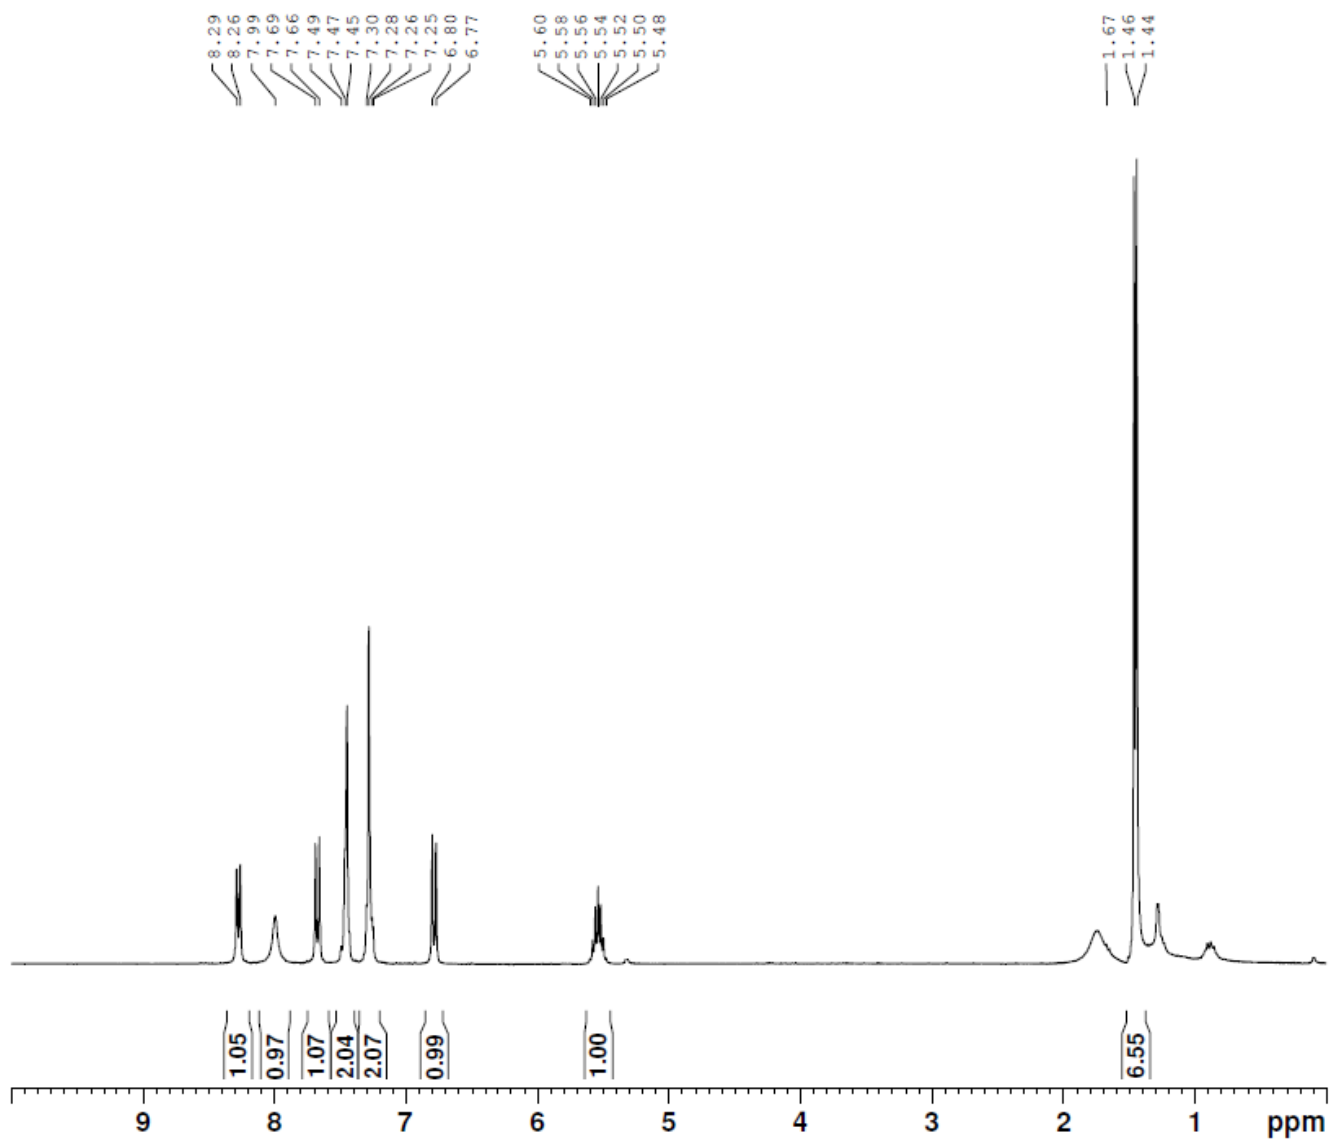

**2-isopropoxy-5*H*-pyrido[3,2-*b*]indole**

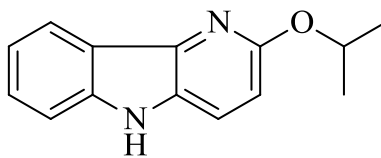

**9b**

$^{13}\text{C}$  NMR (75 MHz,  $\text{CDCl}_3$ )

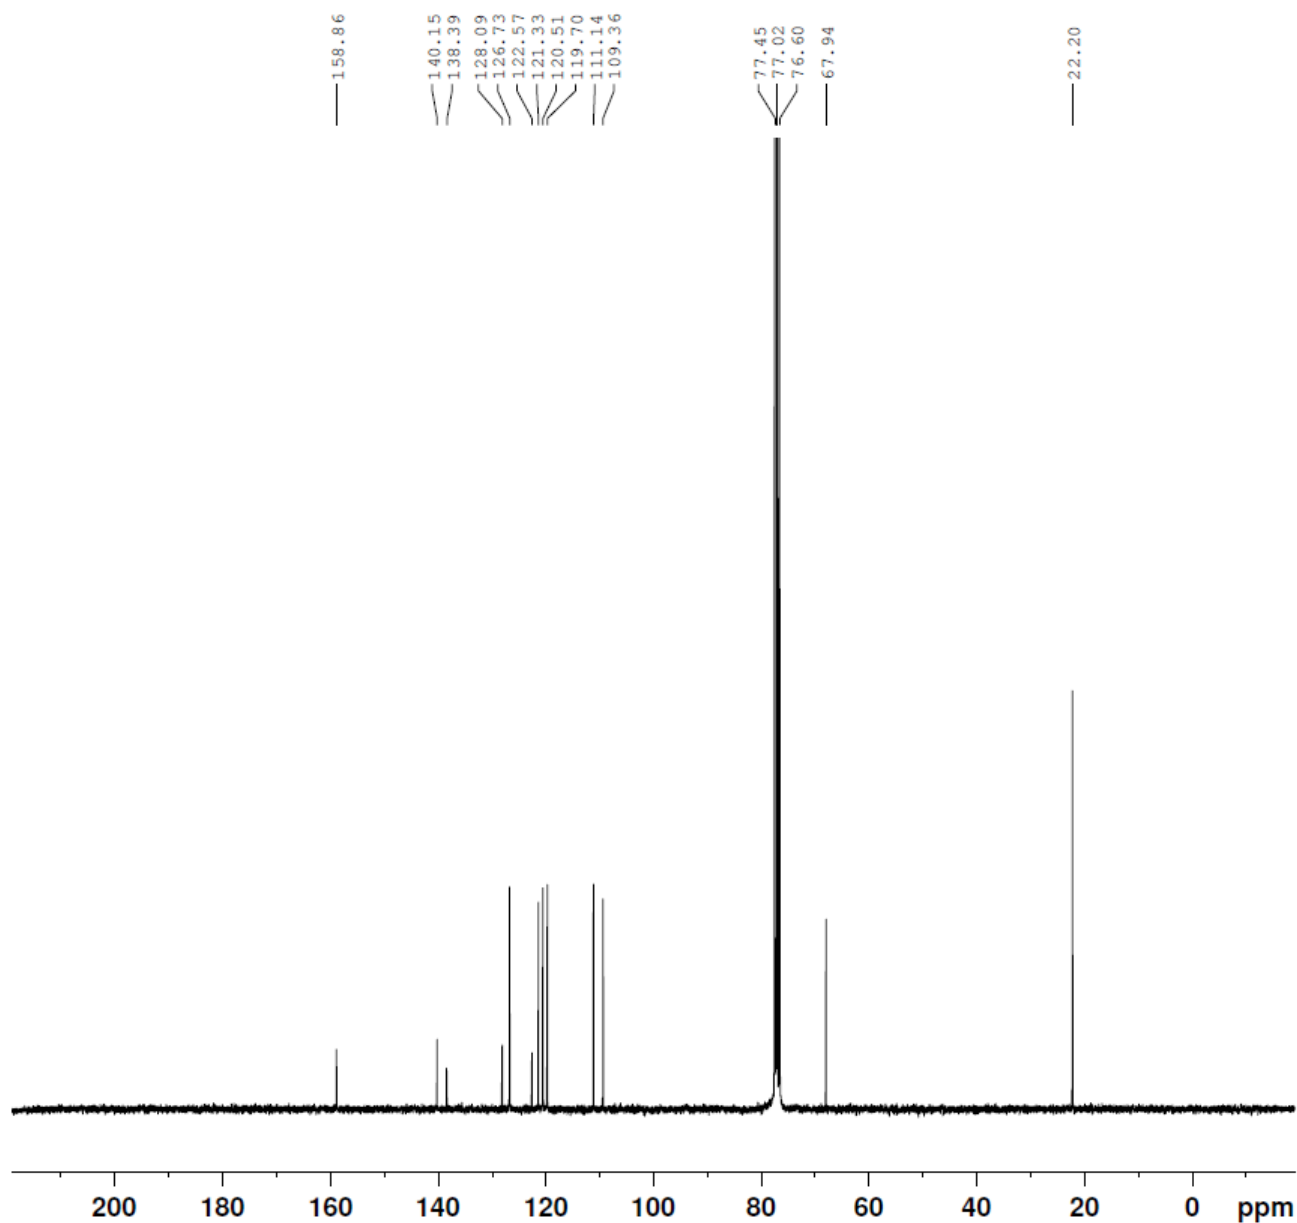

***tert*-butyl 9*H*-pyrido[3,4-*b*]indole-3-carboxylate**

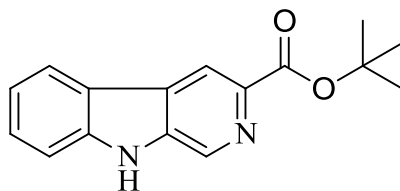

**$\beta$ CCT (3)**

$^1\text{H NMR}$  (300 MHz,  $\text{CDCl}_3$ )

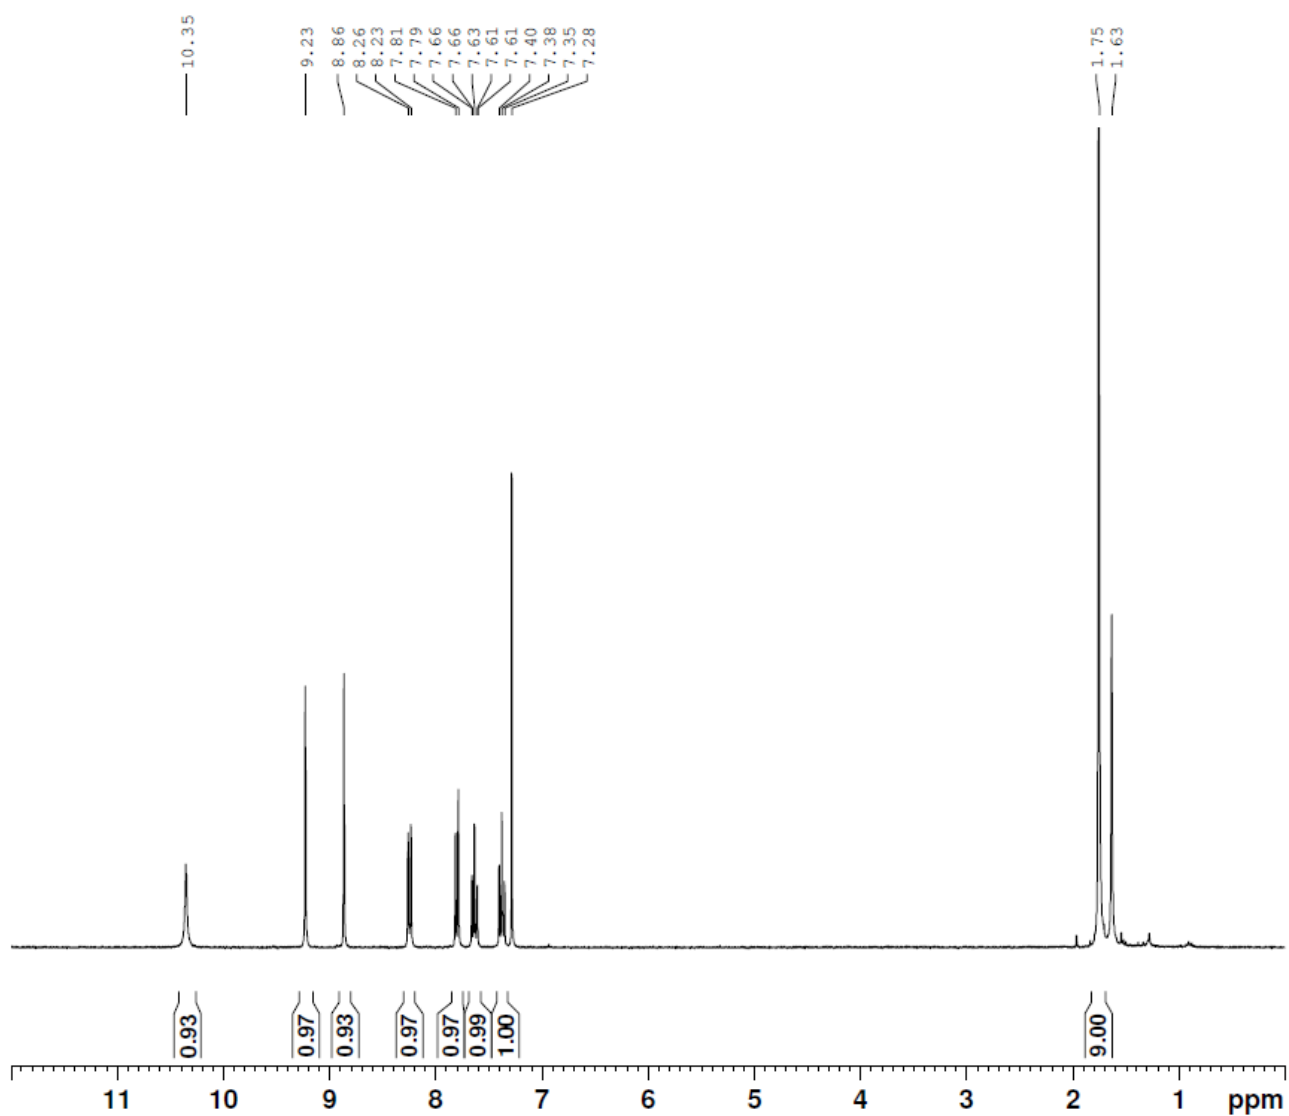

*tert*-butyl 9*H*-pyrido[3,4-*b*]indole-3-carboxylate

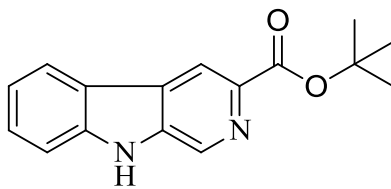

$\beta$ CCT (3)

$^{13}\text{C}$  NMR (75 MHz,  $(\text{CD}_3)_2\text{CO}$ )

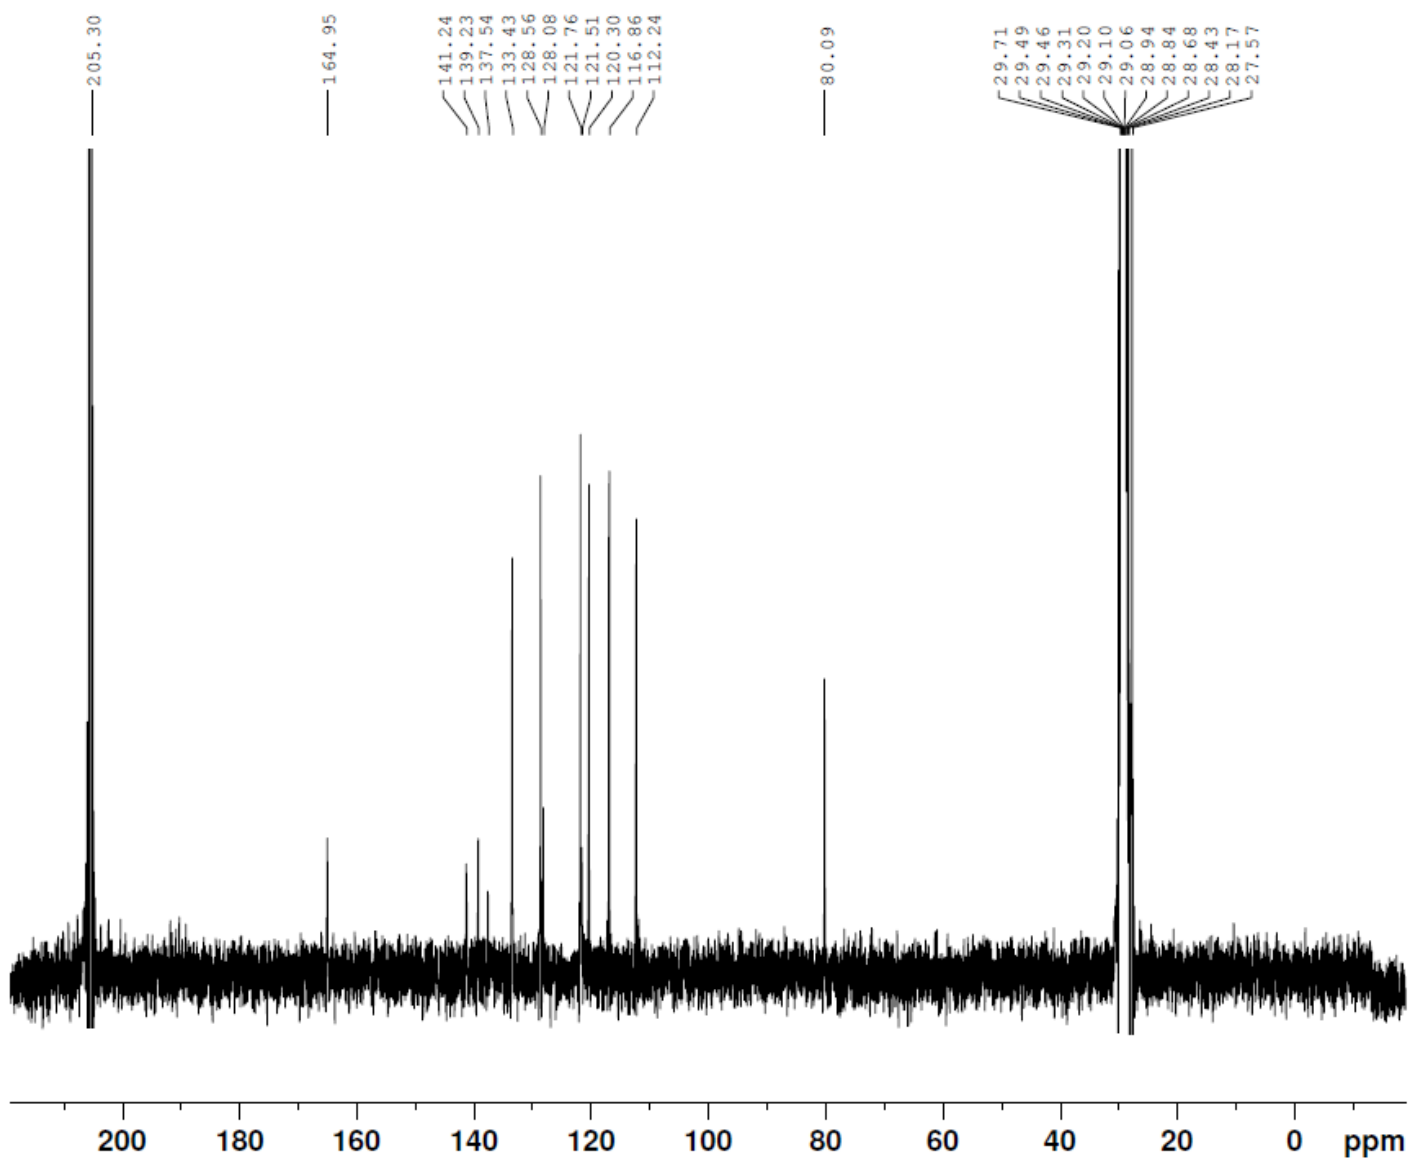

***tert*-butyl 5*H*-pyrido[3,2-*b*]indole-2-carboxylate**

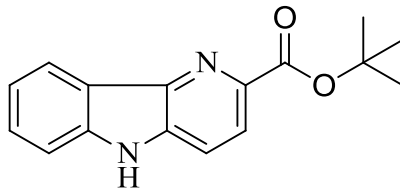

**βCCT (3)**

<sup>1</sup>H NMR (300 MHz, CDCl<sub>3</sub>)

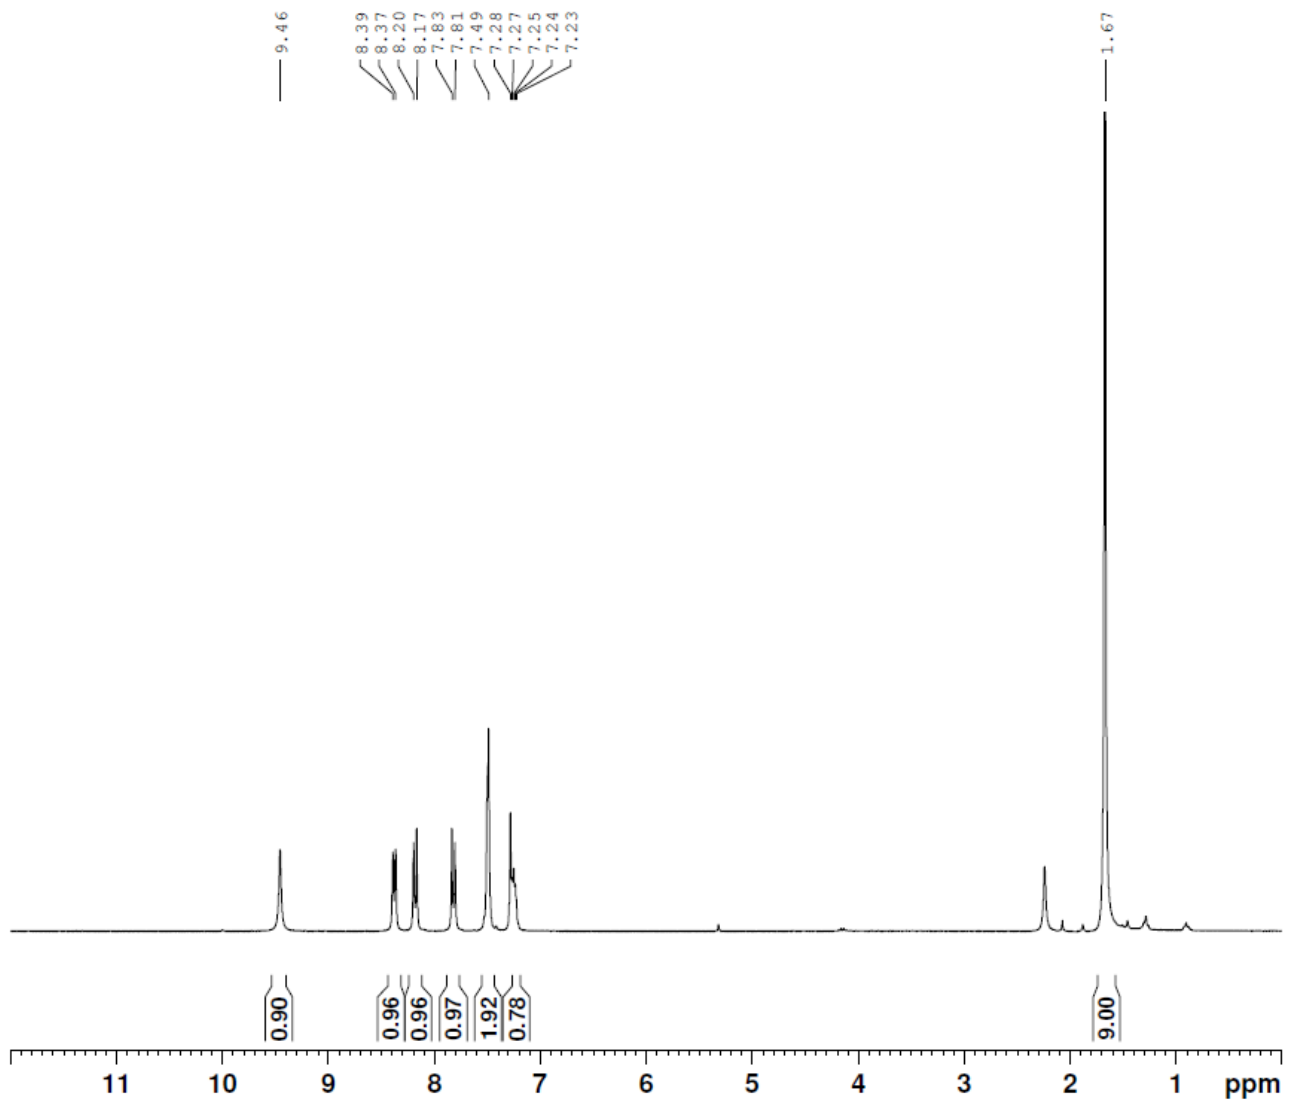

*tert*-butyl 5*H*-pyrido[3,2-*b*]indole-2-carboxylate

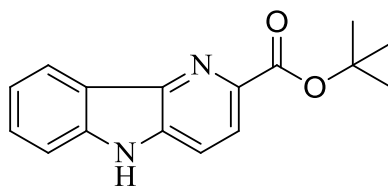

$\beta$ CCT (3)

$^{13}\text{C}$  NMR (75 MHz,  $\text{CDCl}_3$ )

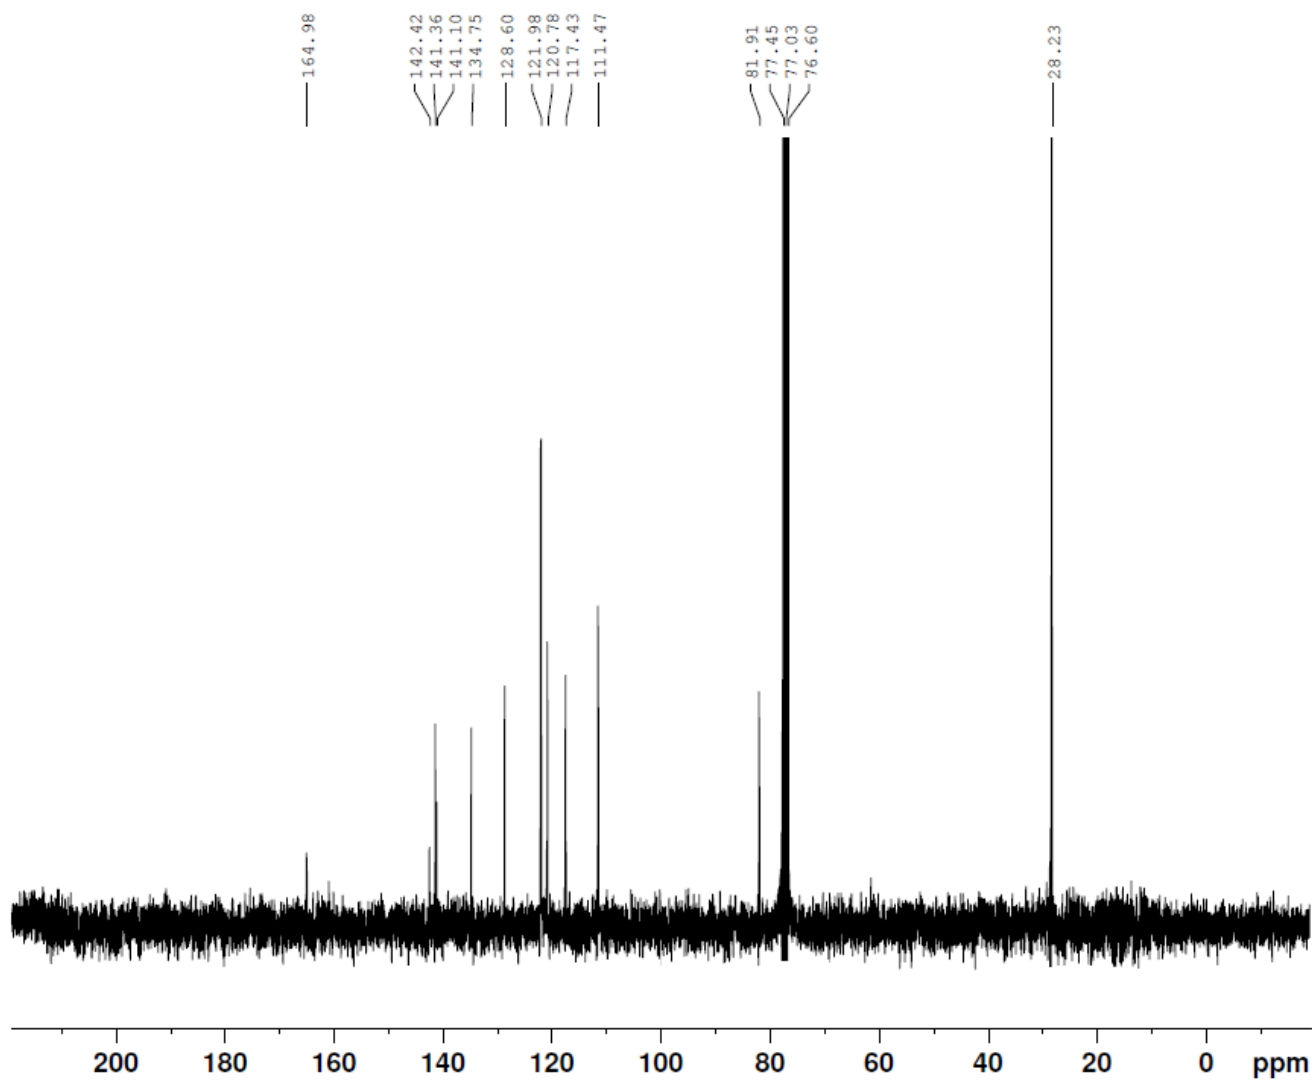



**8-propoxy-5H-pyrrolo[2,3-c:4,5-c']dipyridine**

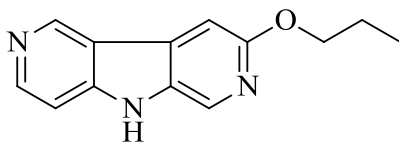

**AZA-3-PBC (4)**

<sup>1</sup>H NMR (300 MHz, (CD<sub>3</sub>)<sub>2</sub>SO)

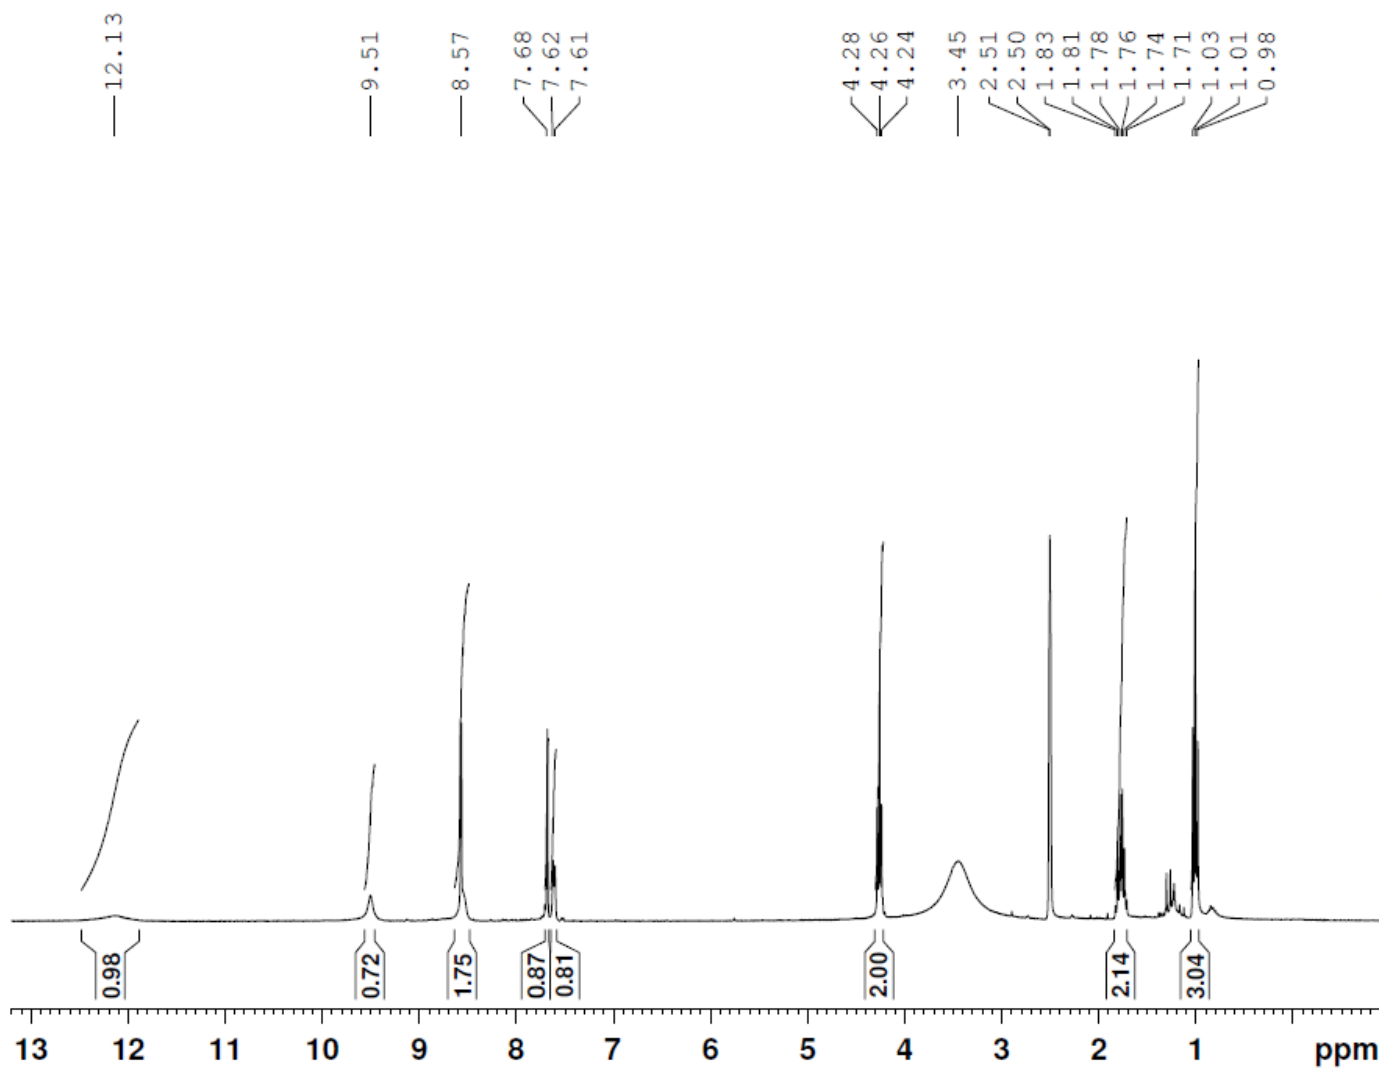

**8-propoxy-5H-pyrrolo[2,3-c:4,5-c']dipyridine**

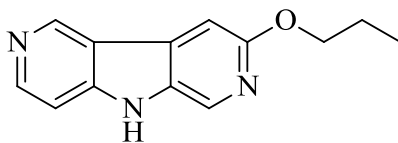

**AZA-3-PBC (4)**

$^{13}\text{C}$  NMR (75 MHz,  $(\text{CD}_3)_2\text{SO}$ )

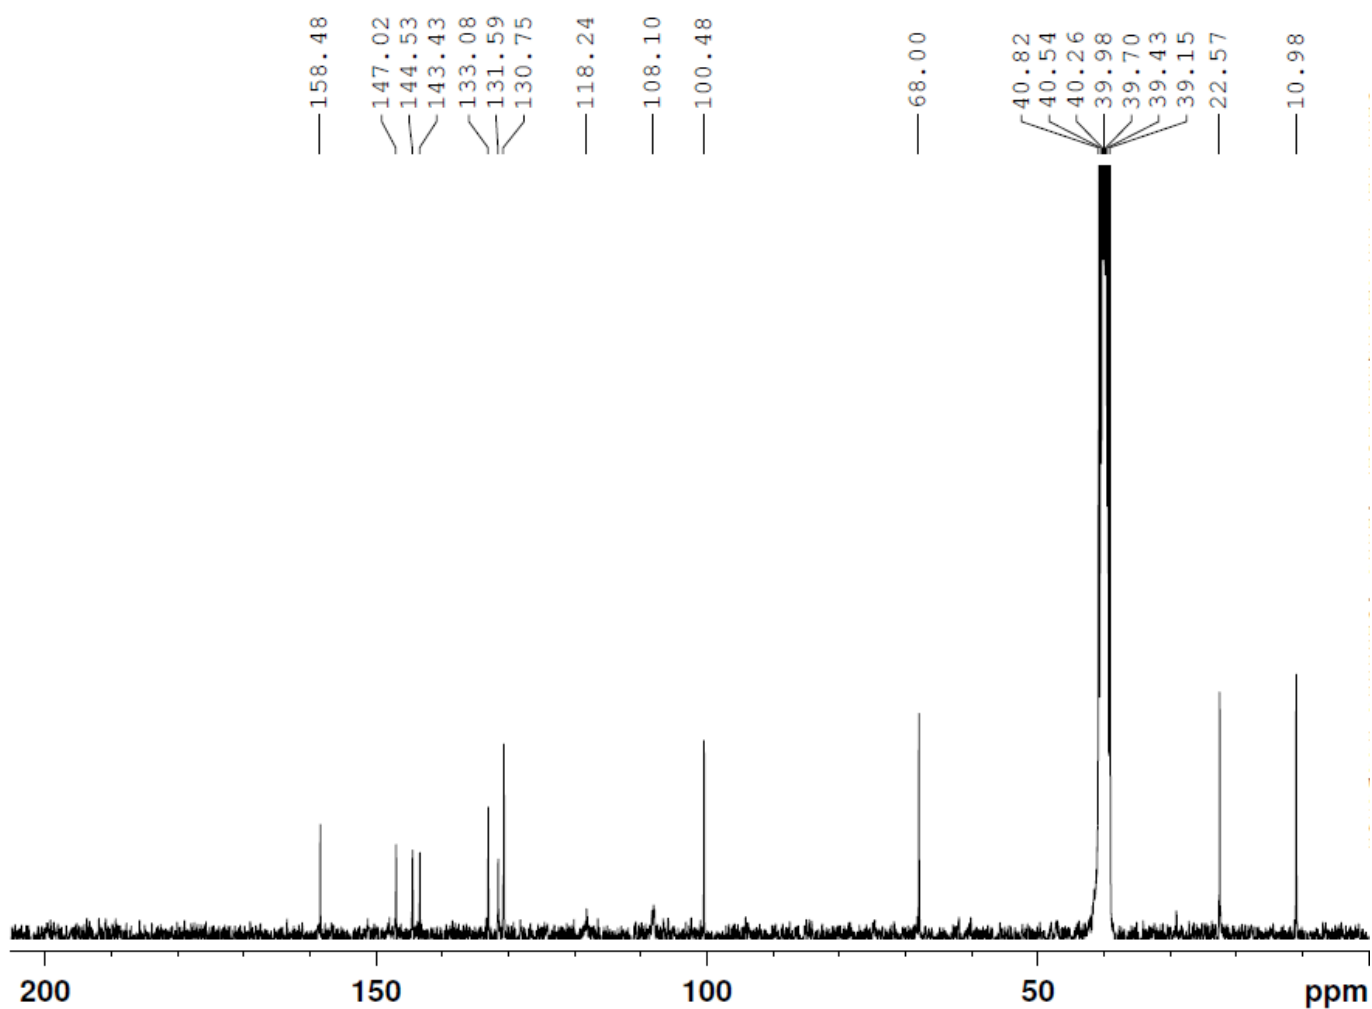

**2-propoxy-5H-pyrrolo[3,2-b:4,5-c']dipyridine**

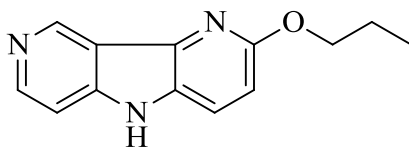

**9d**

$^1\text{H NMR}$  (300 MHz,  $(\text{CD}_3)_2\text{SO}$ )

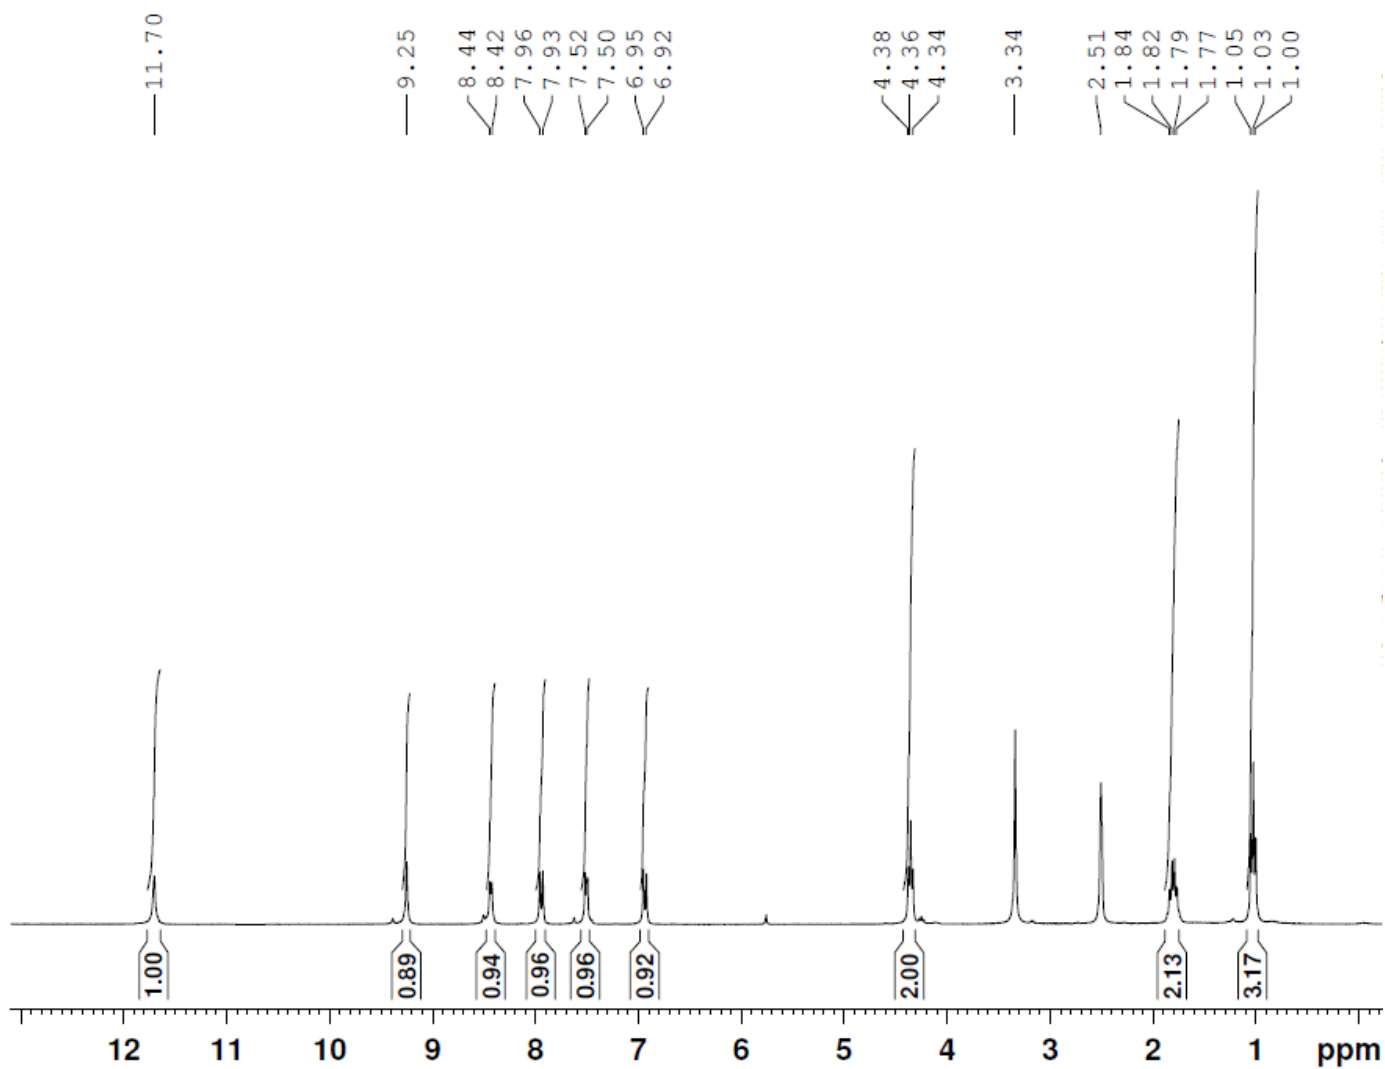

**2-propoxy-5*H*-pyrrolo[3,2-*b*:4,5-*c'*]dipyridine**

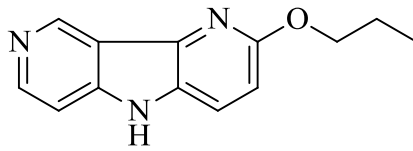

**9d**

$^{13}\text{C}$  NMR (75 MHz,  $(\text{CD}_3)_2\text{SO}$ )

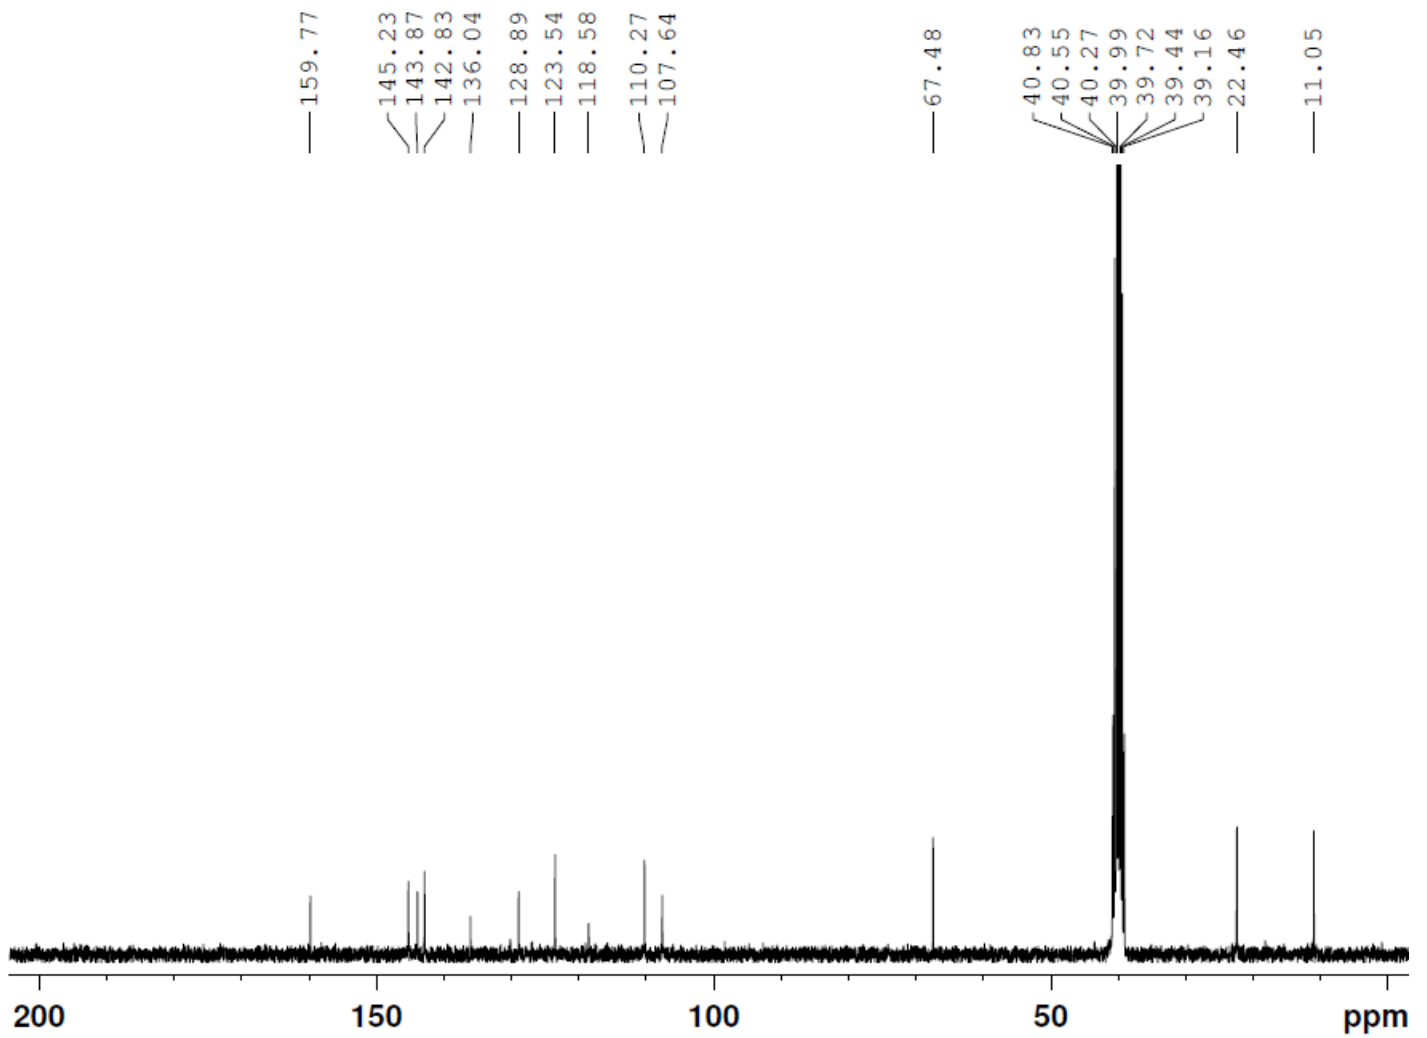

**8-isopropoxy-5H-pyrrolo[2,3-c:4,5-c']dipyridine**

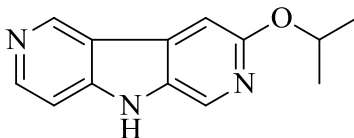

**AZA-3-ISOPBC (5)**

$^1\text{H}$  NMR (300 MHz,  $(\text{CD}_3)_2\text{SO}$ )

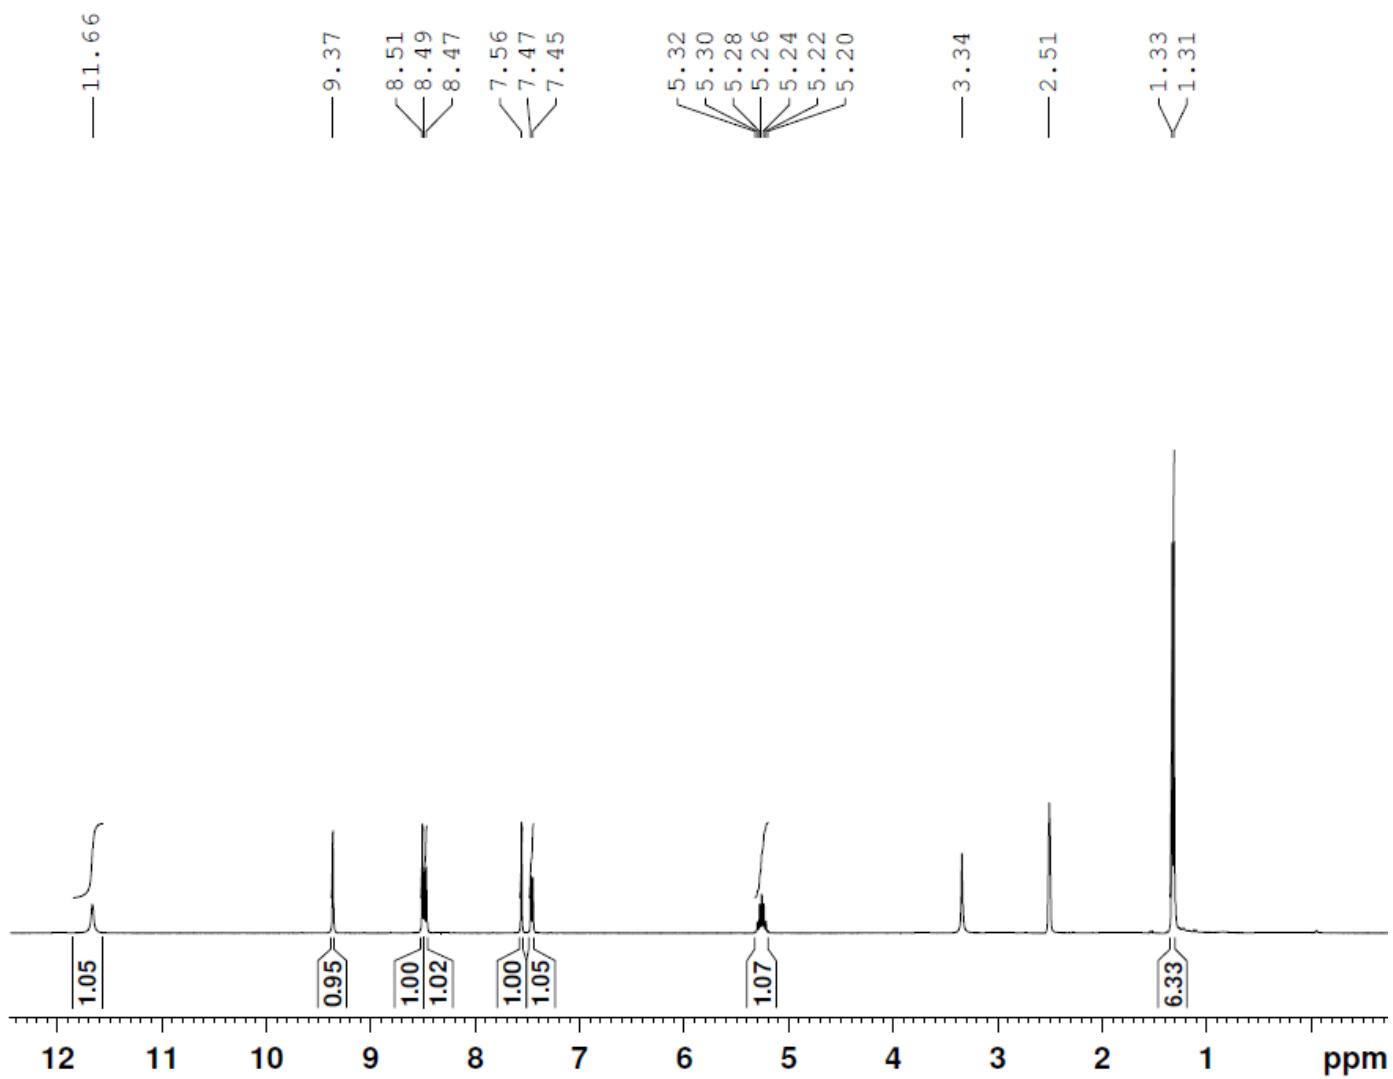

**8-isopropoxy-5H-pyrrolo[2,3-c:4,5-c']dipyridine**

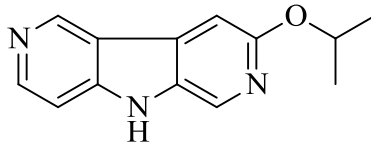

**AZA-3-ISOPBC (5)**

$^{13}\text{C}$  NMR (125 MHz,  $(\text{CD}_3)_2\text{SO}$ )

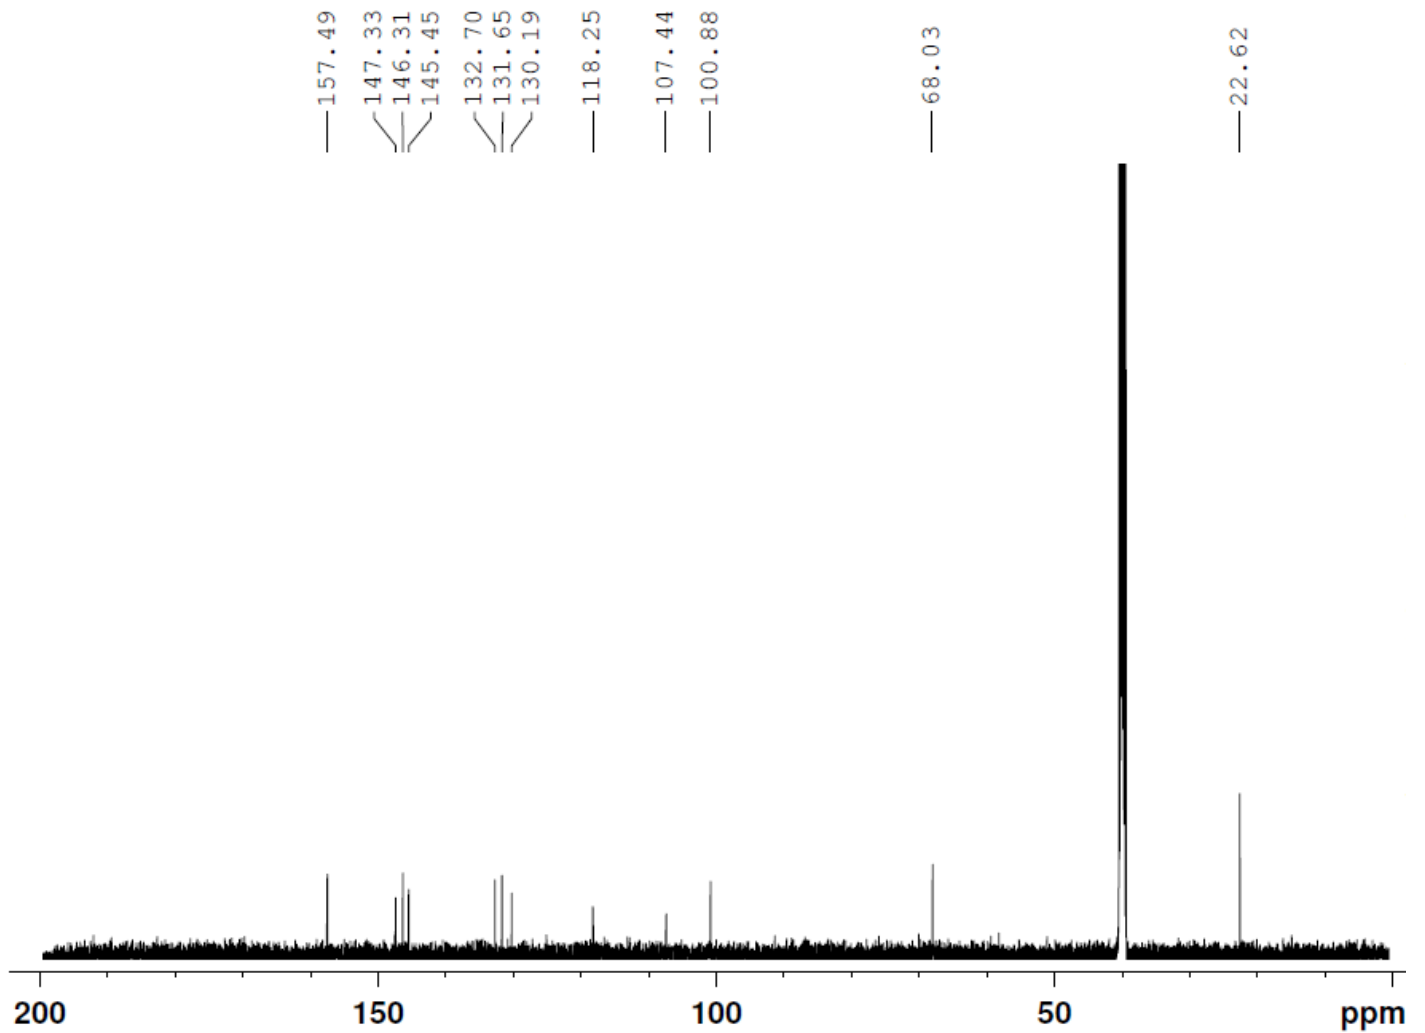

**2-isopropoxy-5*H*-pyrrolo[3,2-*b*:4,5-*c'*]dipyridine**

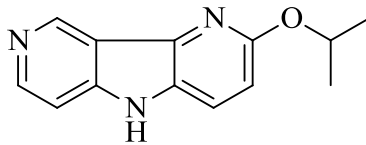

**9e**

<sup>1</sup>H NMR (500 MHz, (CD<sub>3</sub>)<sub>2</sub>SO)

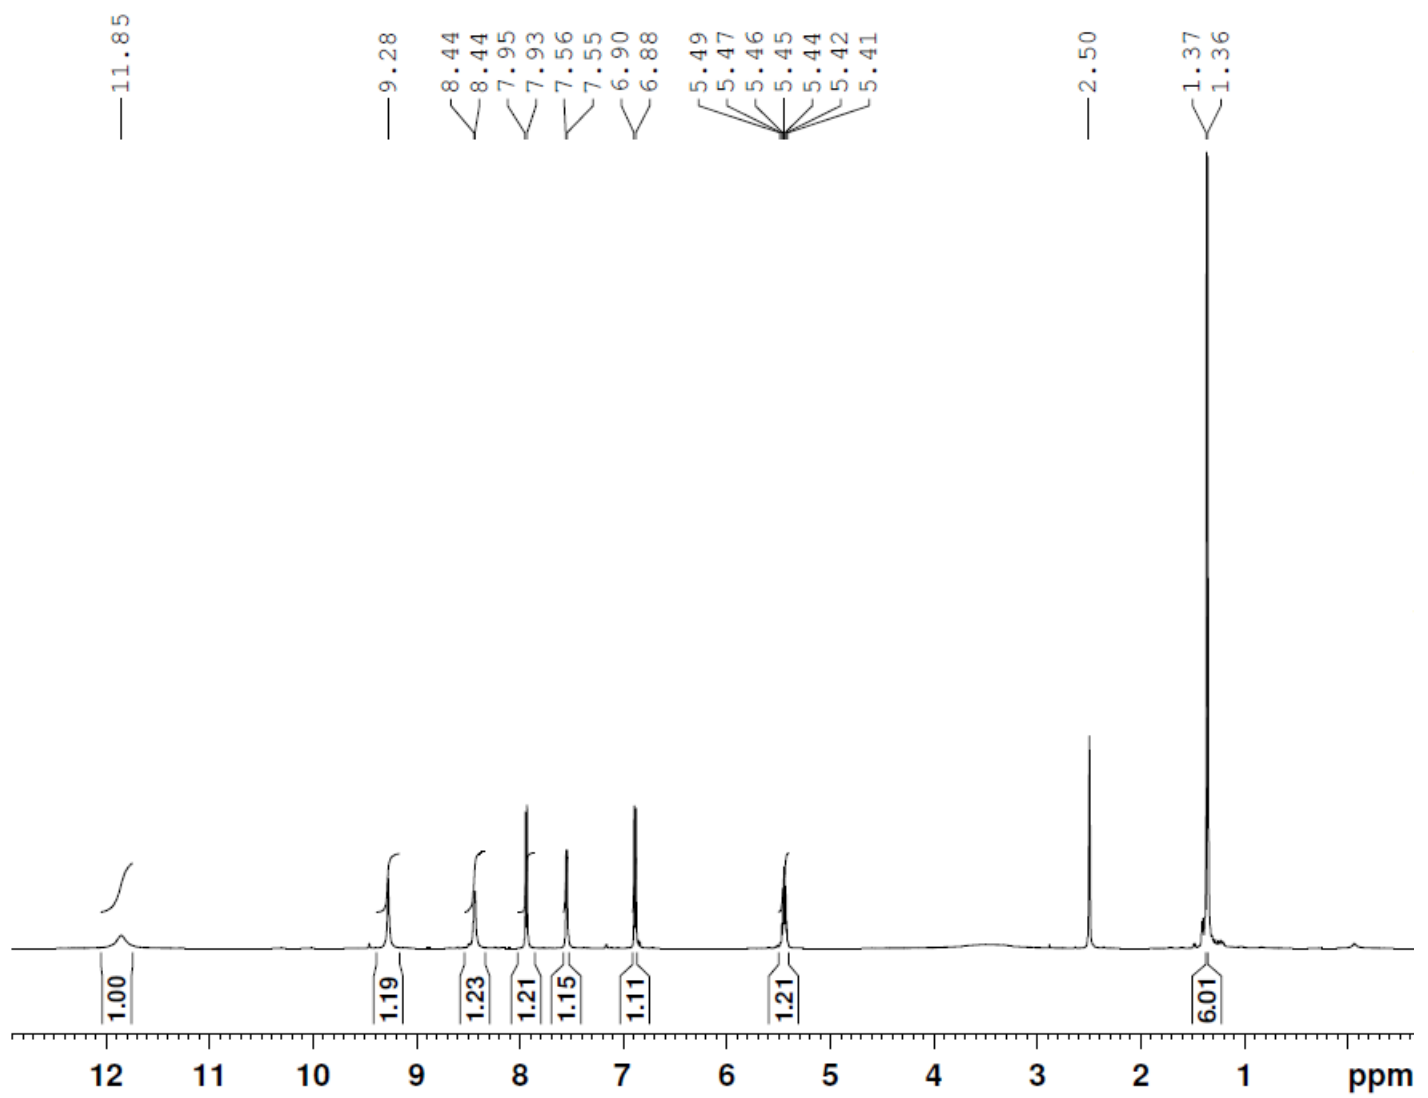

**2-isopropoxy-5H-pyrrolo[3,2-b:4,5-c']dipyridine**

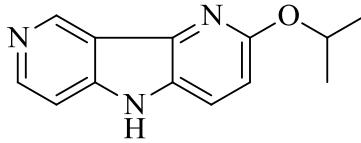

**9e**

$^{13}\text{C}$  NMR (125 MHz,  $(\text{CD}_3)_2\text{SO}$ )

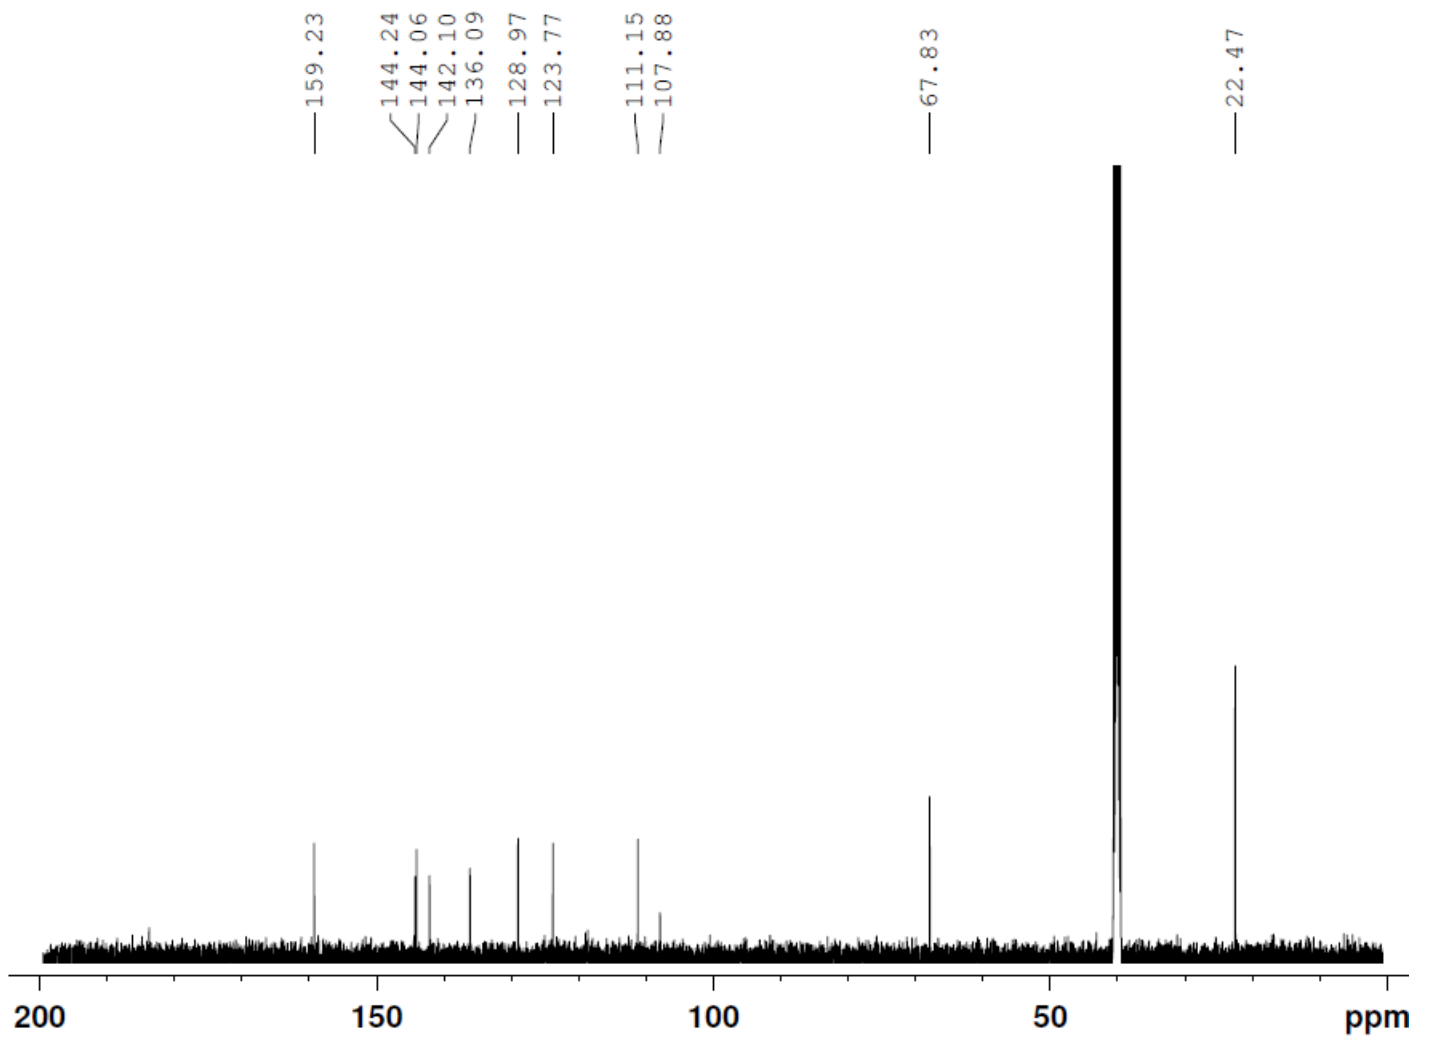



***tert*-butyl (2-chlorophenyl)(6-isopropoxy-pyridin-3-yl)carbamate**

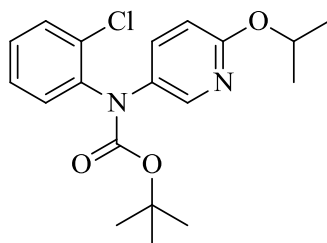

**10**

$^1\text{H}$  NMR (300 MHz,  $\text{CDCl}_3$ )

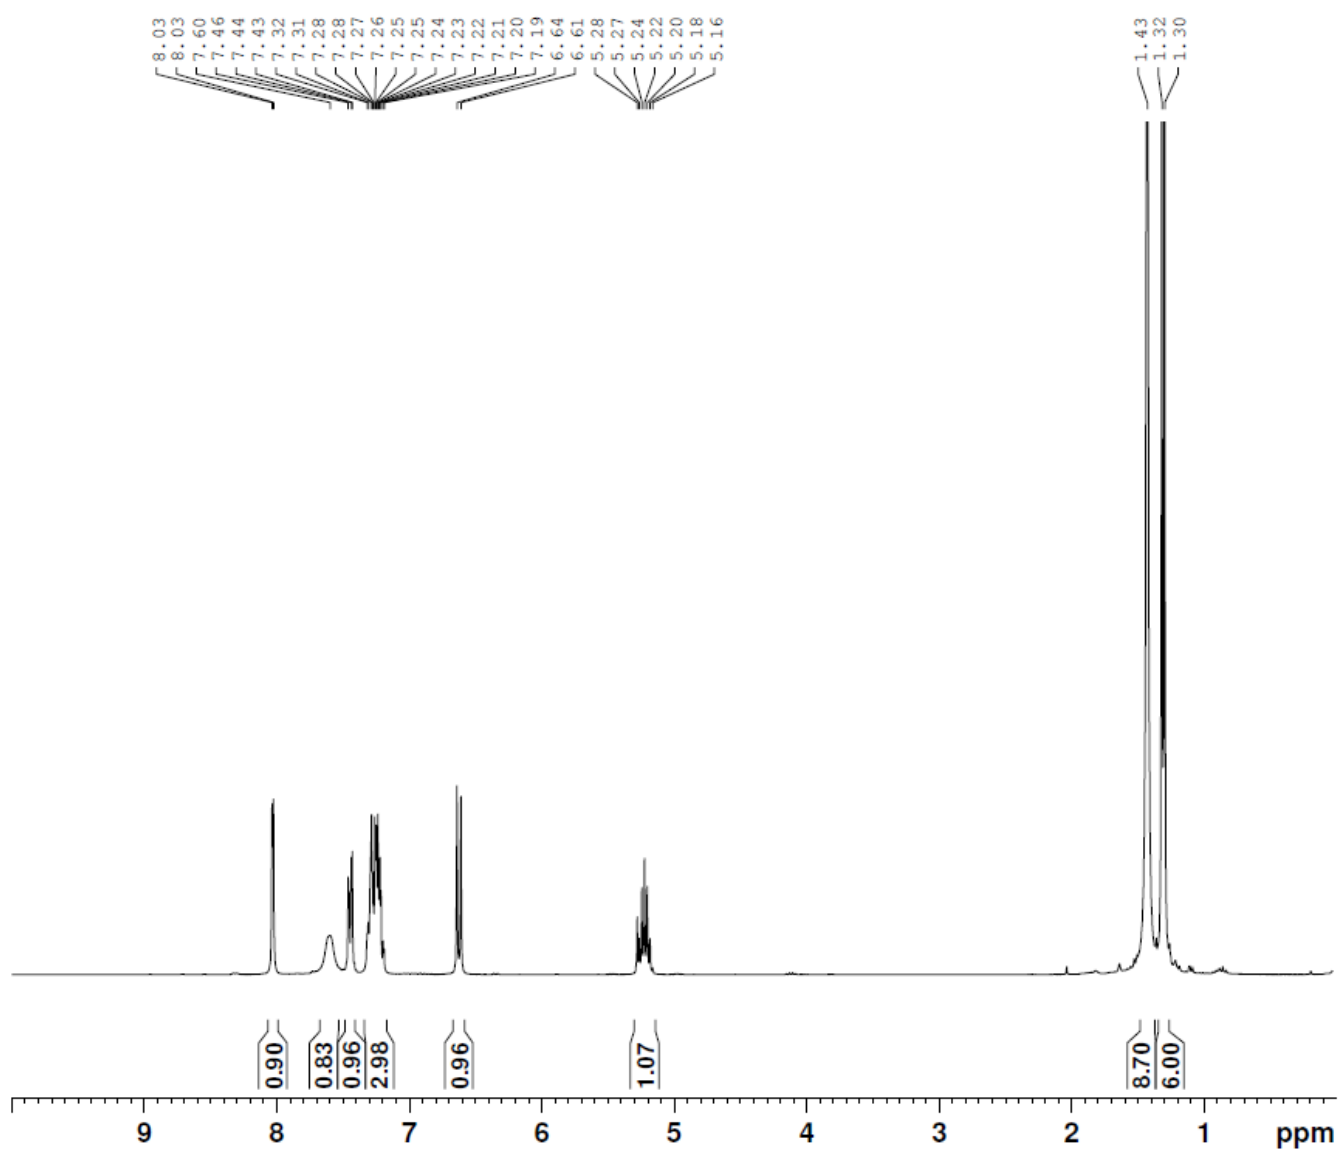

*tert*-butyl (2-chlorophenyl)(6-isopropoxy-pyridin-3-yl)carbamate

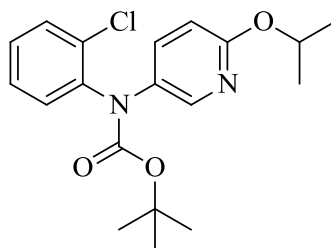

**10**

$^{13}\text{C}$  NMR (75 MHz,  $\text{CDCl}_3$ )

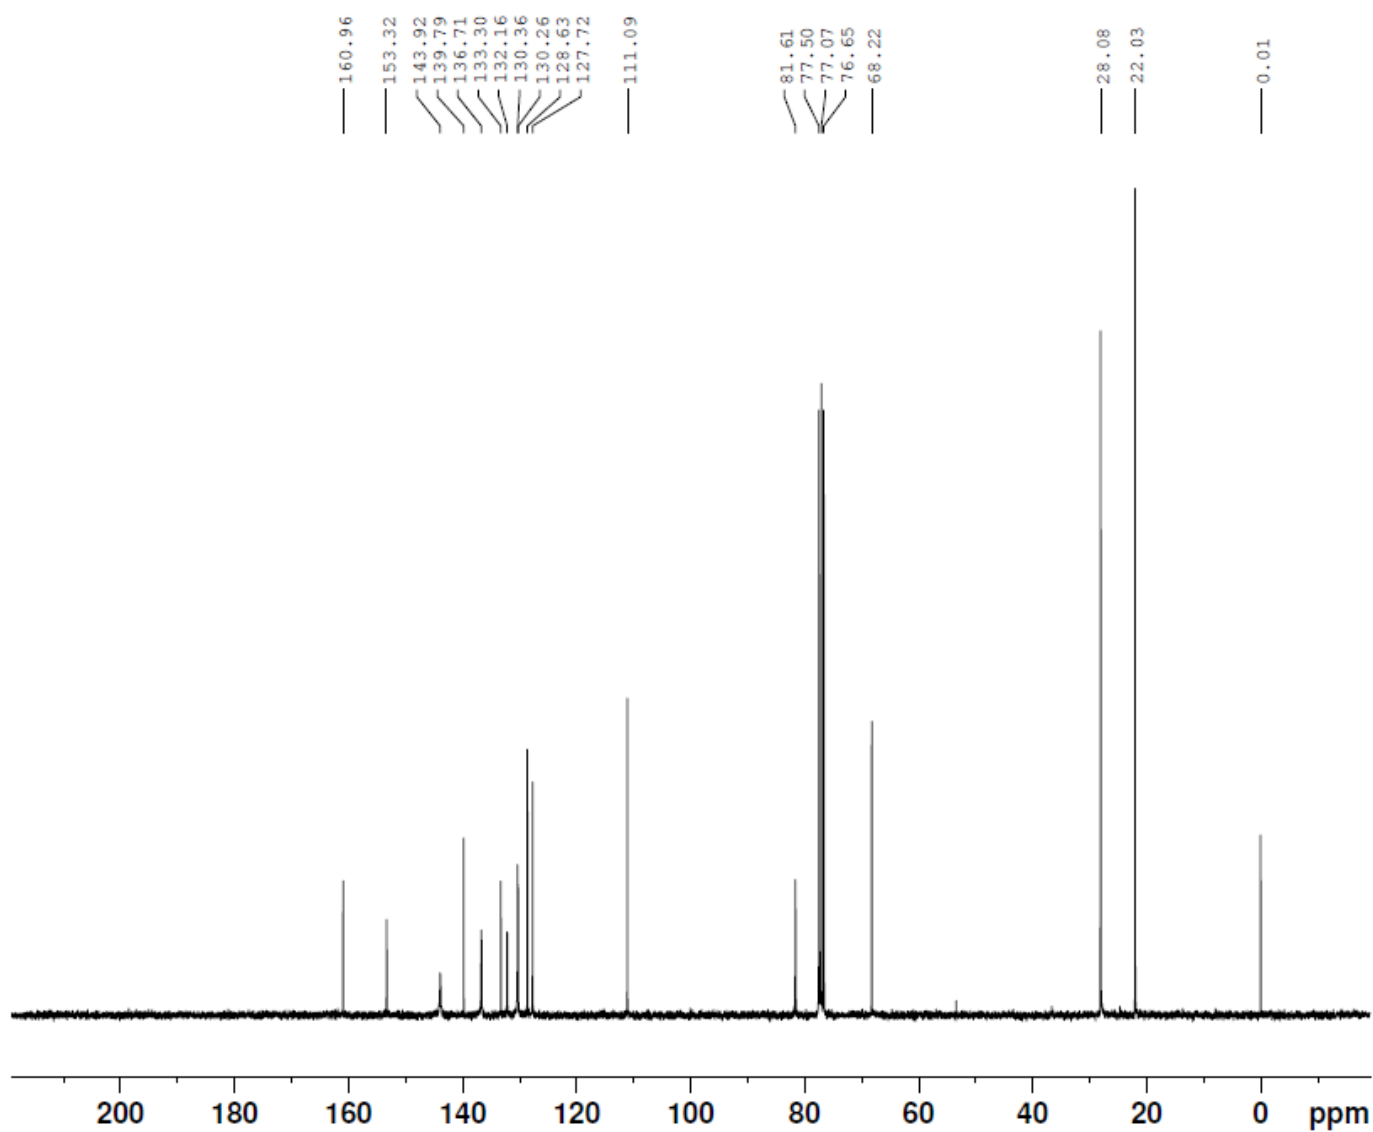

(9H-fluoren-9-yl)methyl (2-chlorophenyl)(6-isopropoxy-pyridin-3-yl)carbamate

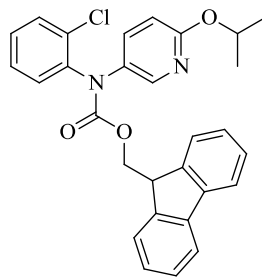

11

<sup>1</sup>H NMR (300 MHz, CDCl<sub>3</sub>)

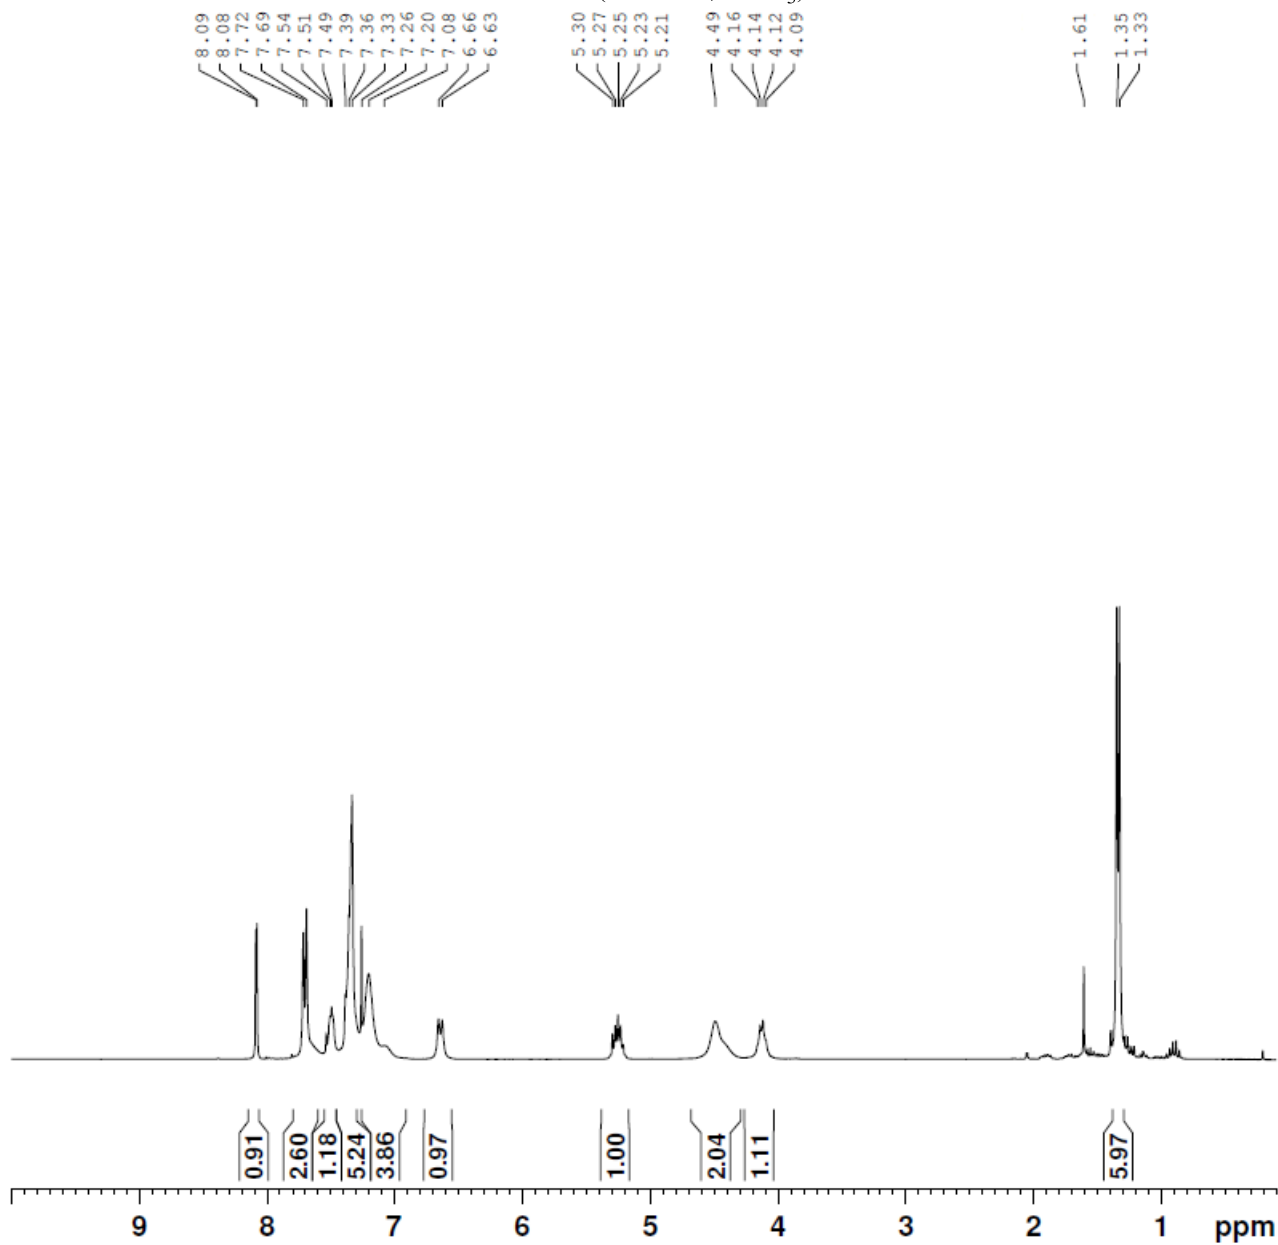

(9H-fluoren-9-yl)methyl (2-chlorophenyl)(6-isopropoxy)pyridin-3-yl)carbamate

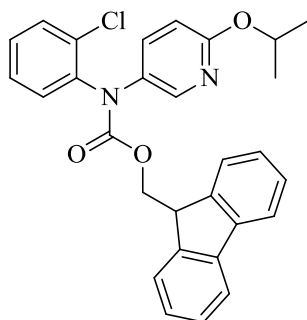

11

$^{13}\text{C}$  NMR (75 MHz,  $\text{CDCl}_3$ )

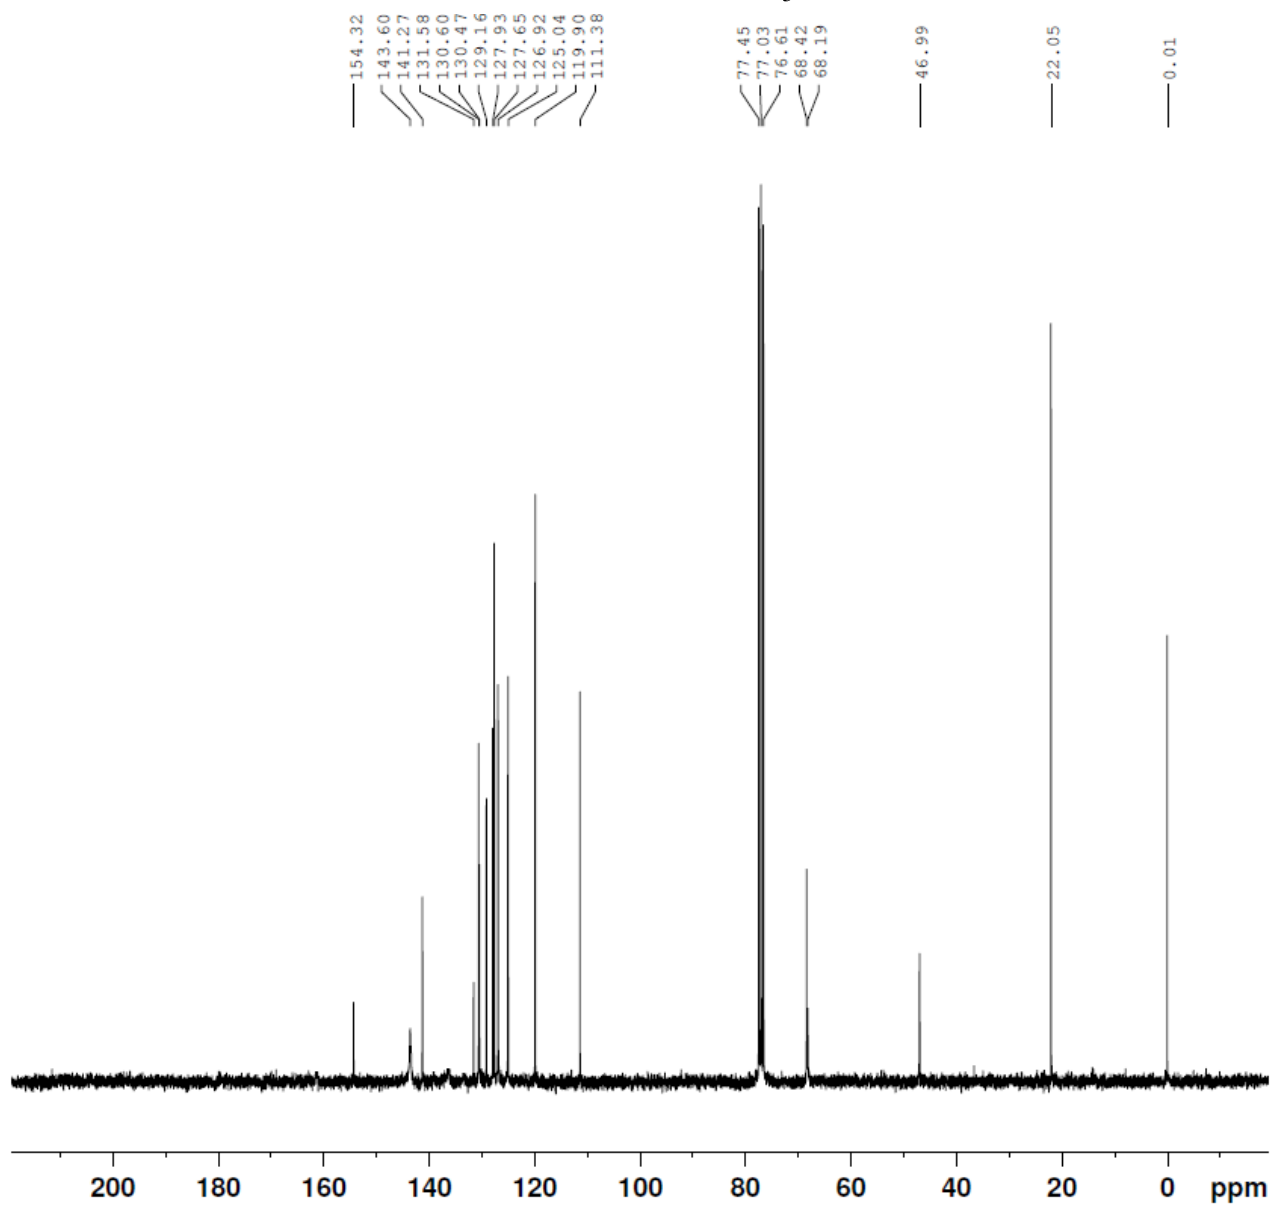

**4-chloro-*N*-phenyl-6-propoxy-pyridin-3-amine**

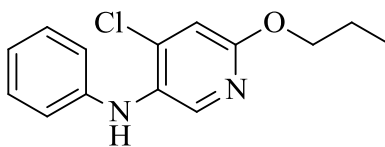

**15**

<sup>1</sup>H NMR (300 MHz, CDCl<sub>3</sub>)

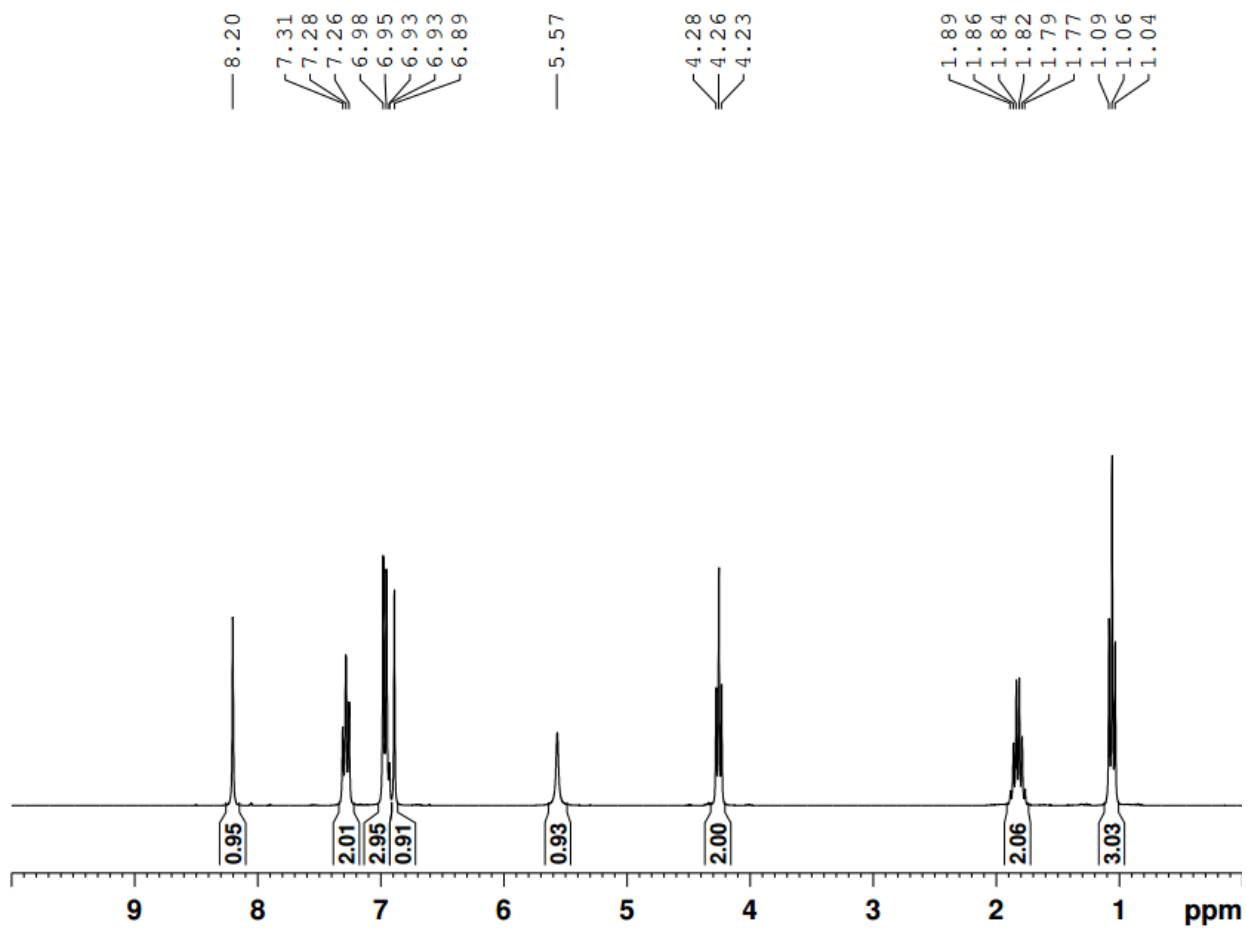

**4-chloro-*N*-phenyl-6-propoxy-pyridin-3-amine**

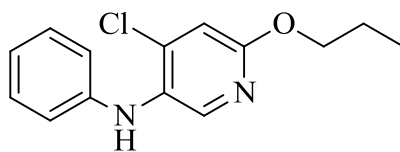

**15**

<sup>13</sup>C NMR (75 MHz, CDCl<sub>3</sub>)

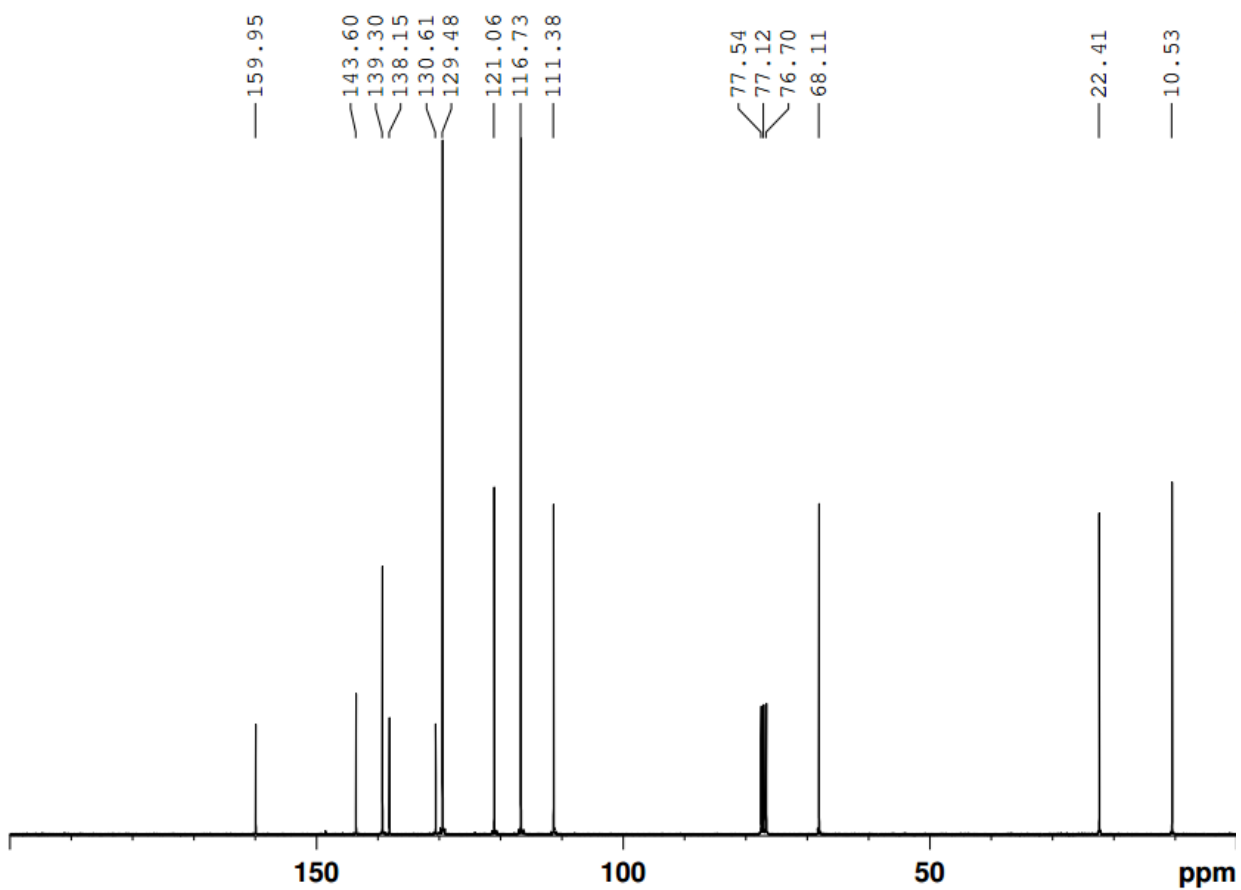

**4-chloro-6-isopropoxy-N-phenylpyridin-3-amine**

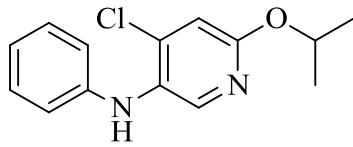

**16**

$^1\text{H}$  NMR (300 MHz,  $\text{CDCl}_3$ )

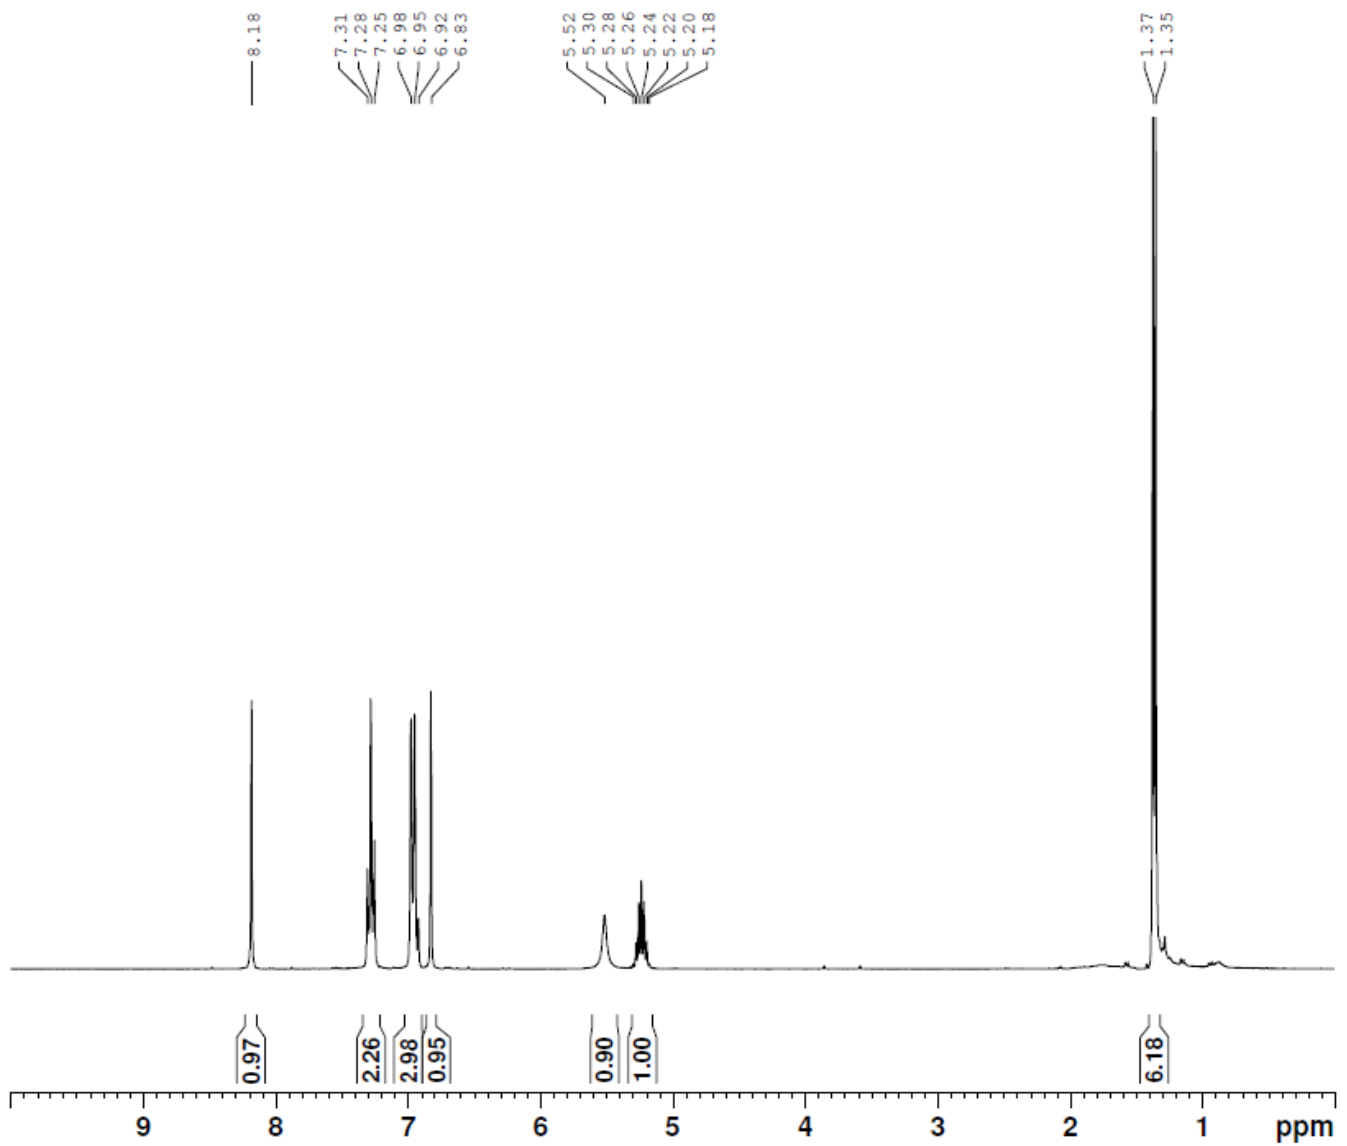

**4-chloro-6-isopropoxy-N-phenylpyridin-3-amine**

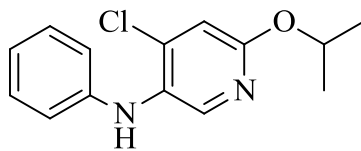

**16**

$^{13}\text{C}$  NMR (75 MHz,  $\text{CDCl}_3$ )

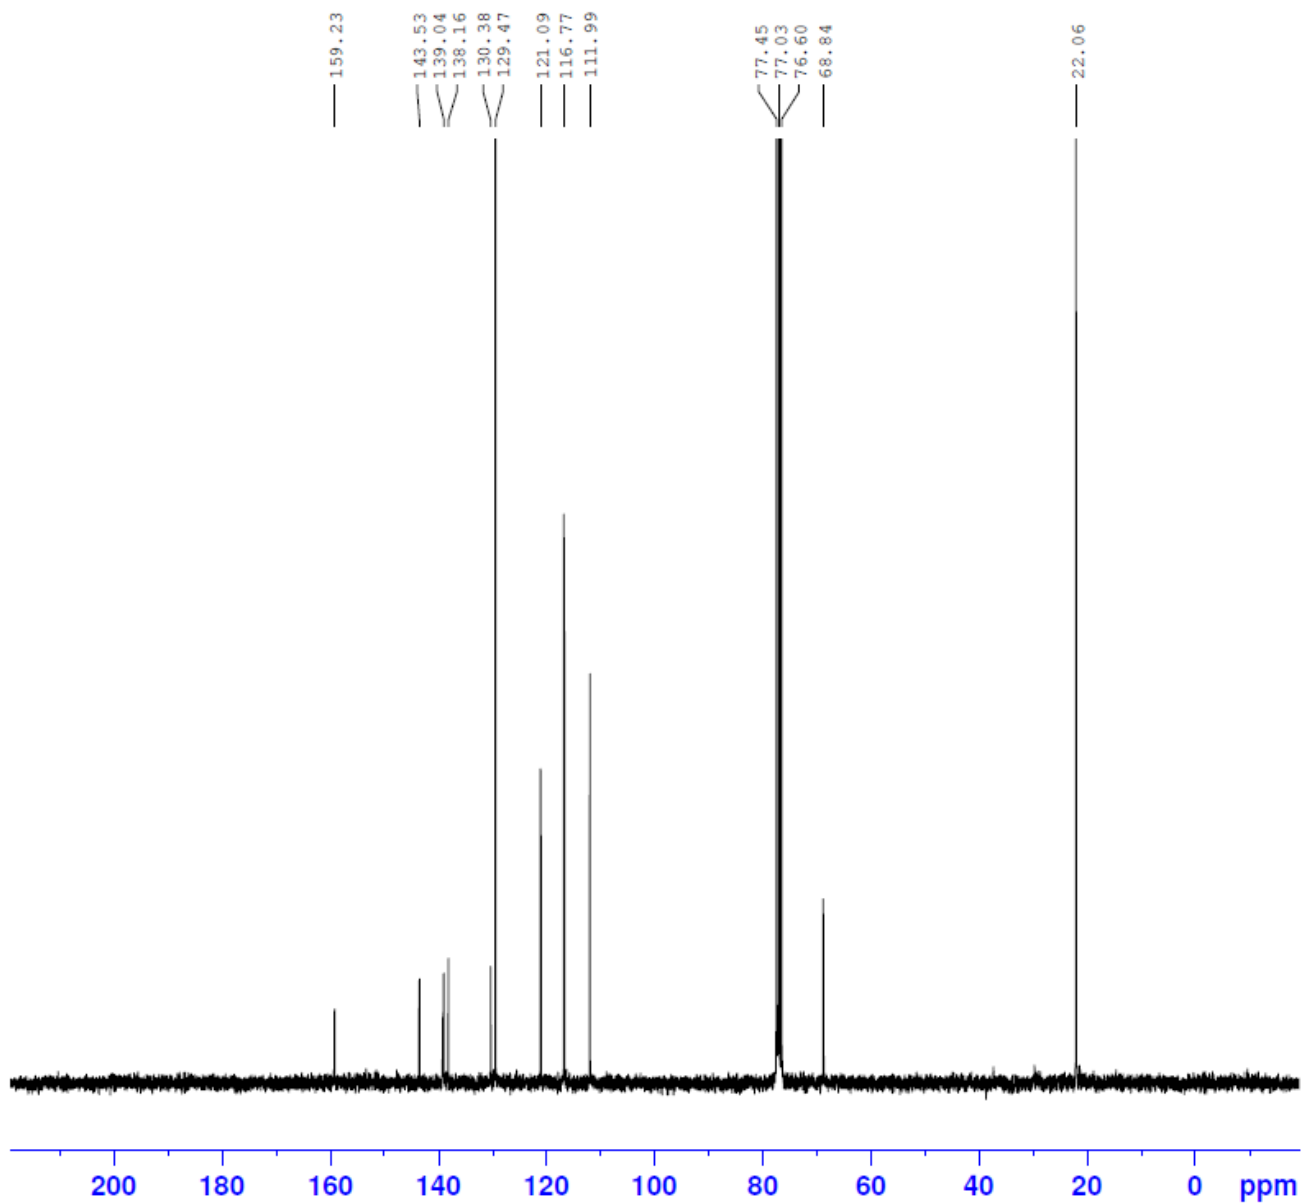



**4-chloro-6-propoxy-N-(pyridin-4-yl)pyridin-3-amine**

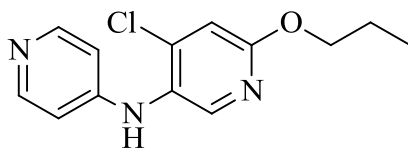

**17**

$^1\text{H}$  NMR (300 MHz,  $\text{CDCl}_3$ )

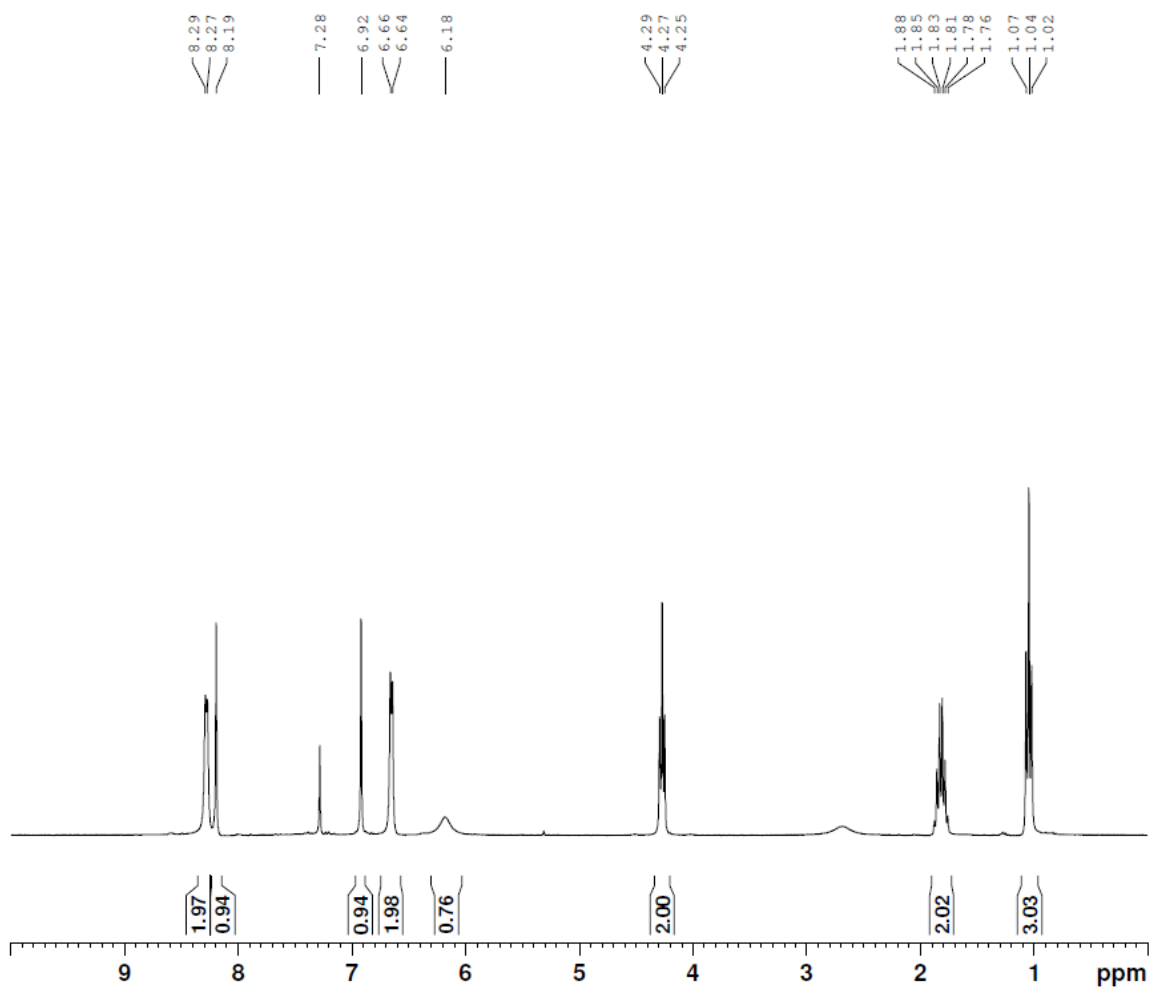

**4-chloro-6-propoxy-N-(pyridin-4-yl)pyridin-3-amine**

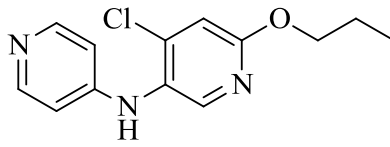

**17**

$^{13}\text{C}$  NMR (75 MHz,  $\text{CDCl}_3$ )

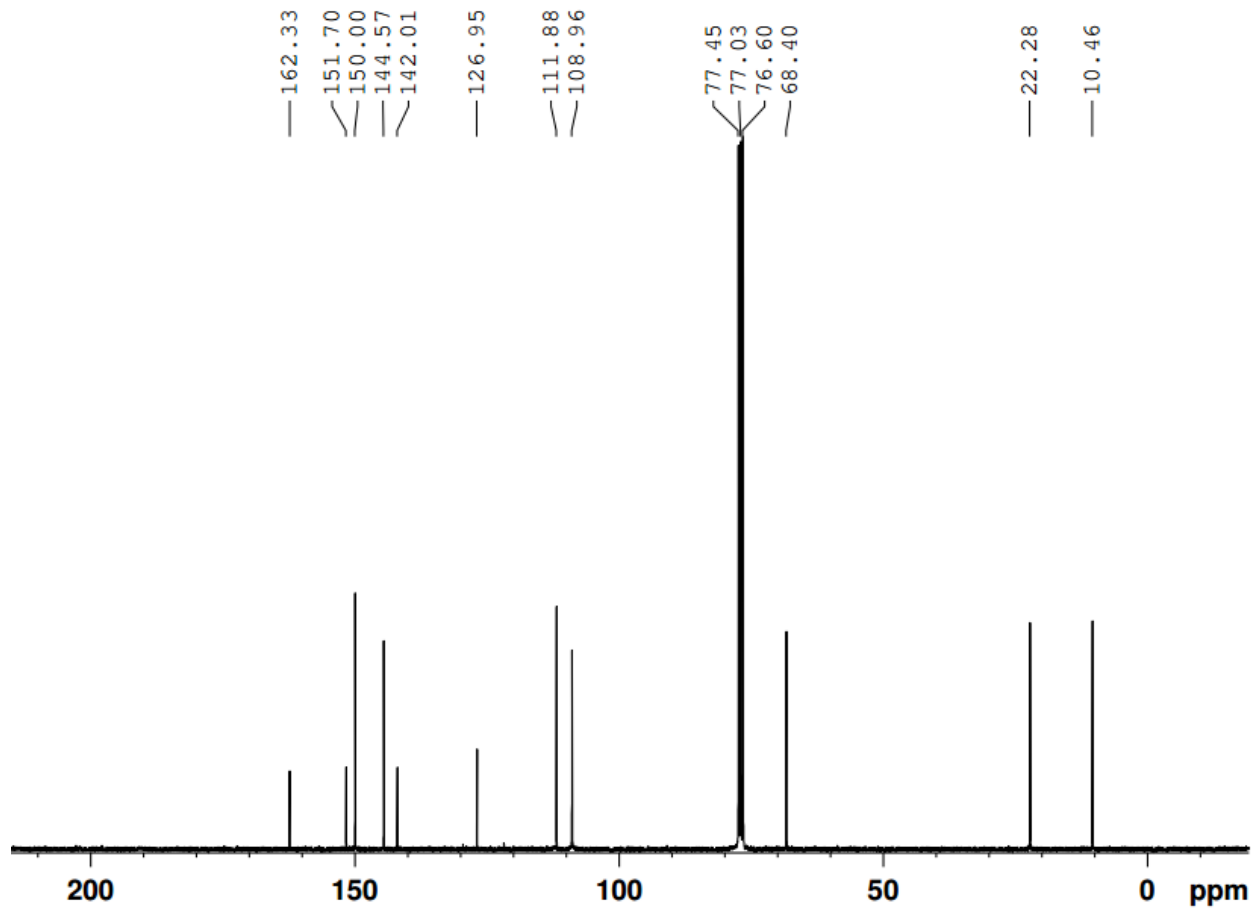

**4-chloro-6-isopropoxy-N-(pyridin-4-yl)pyridin-3-amine**

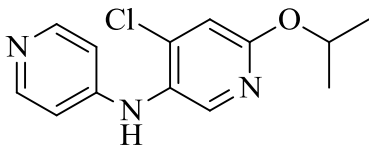

**18**

<sup>1</sup>H NMR (300 MHz, CDCl<sub>3</sub>)

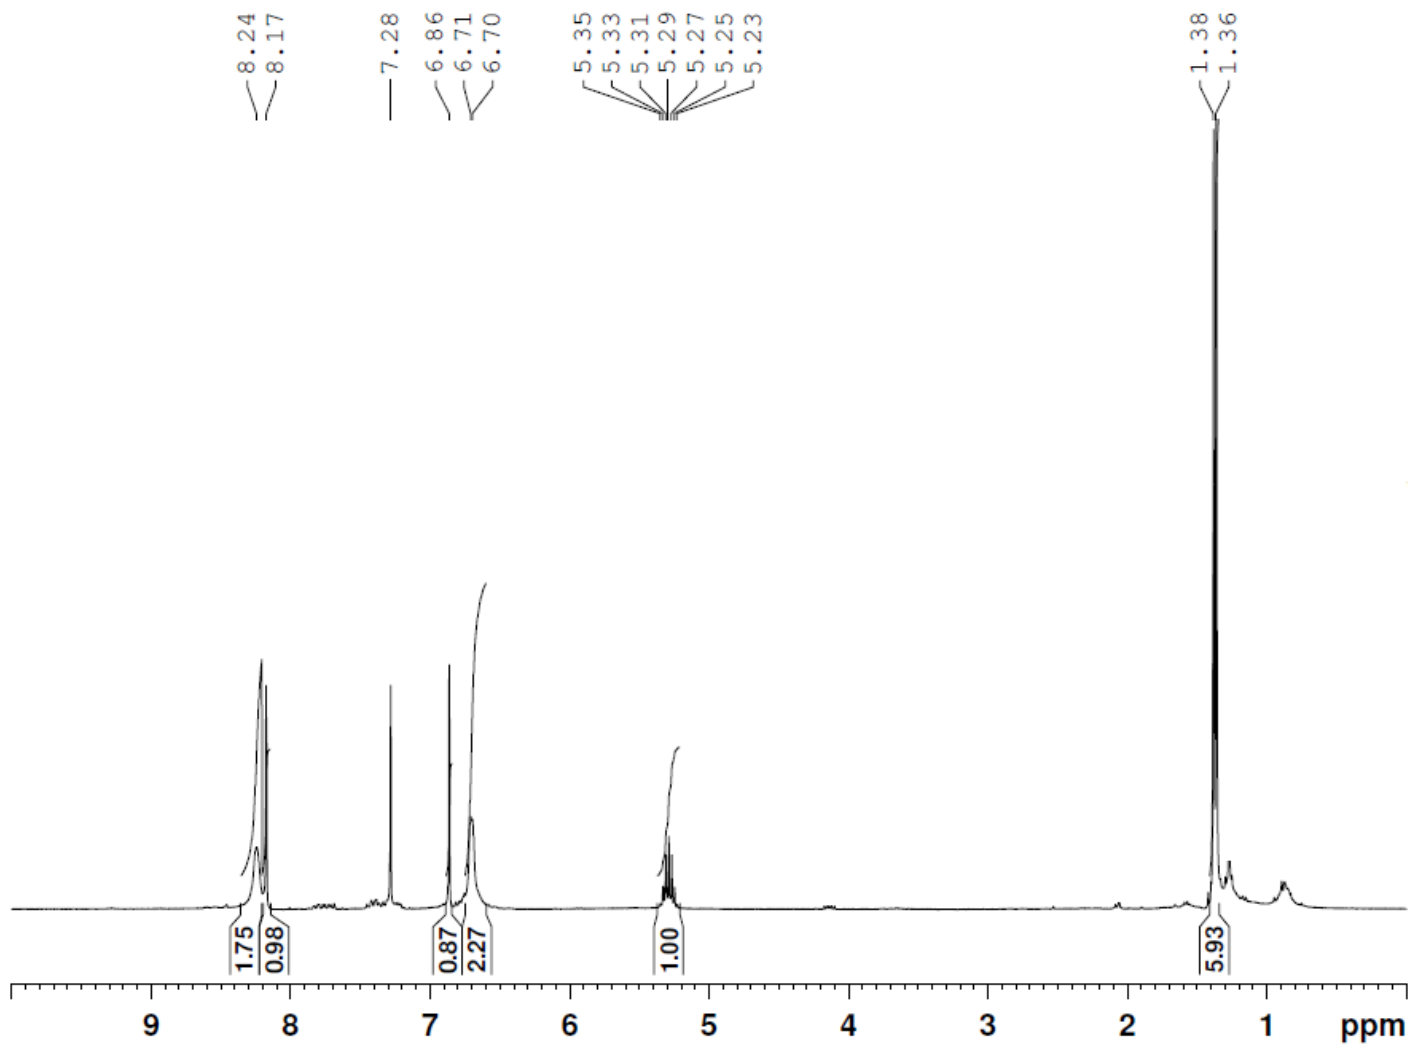

**4-chloro-6-isopropoxy-N-(pyridin-4-yl)pyridin-3-amine**

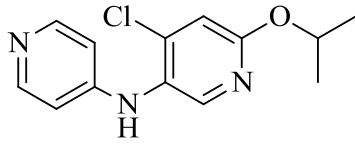

**18**

$^{13}\text{C}$  NMR (75 MHz,  $\text{CDCl}_3$ )

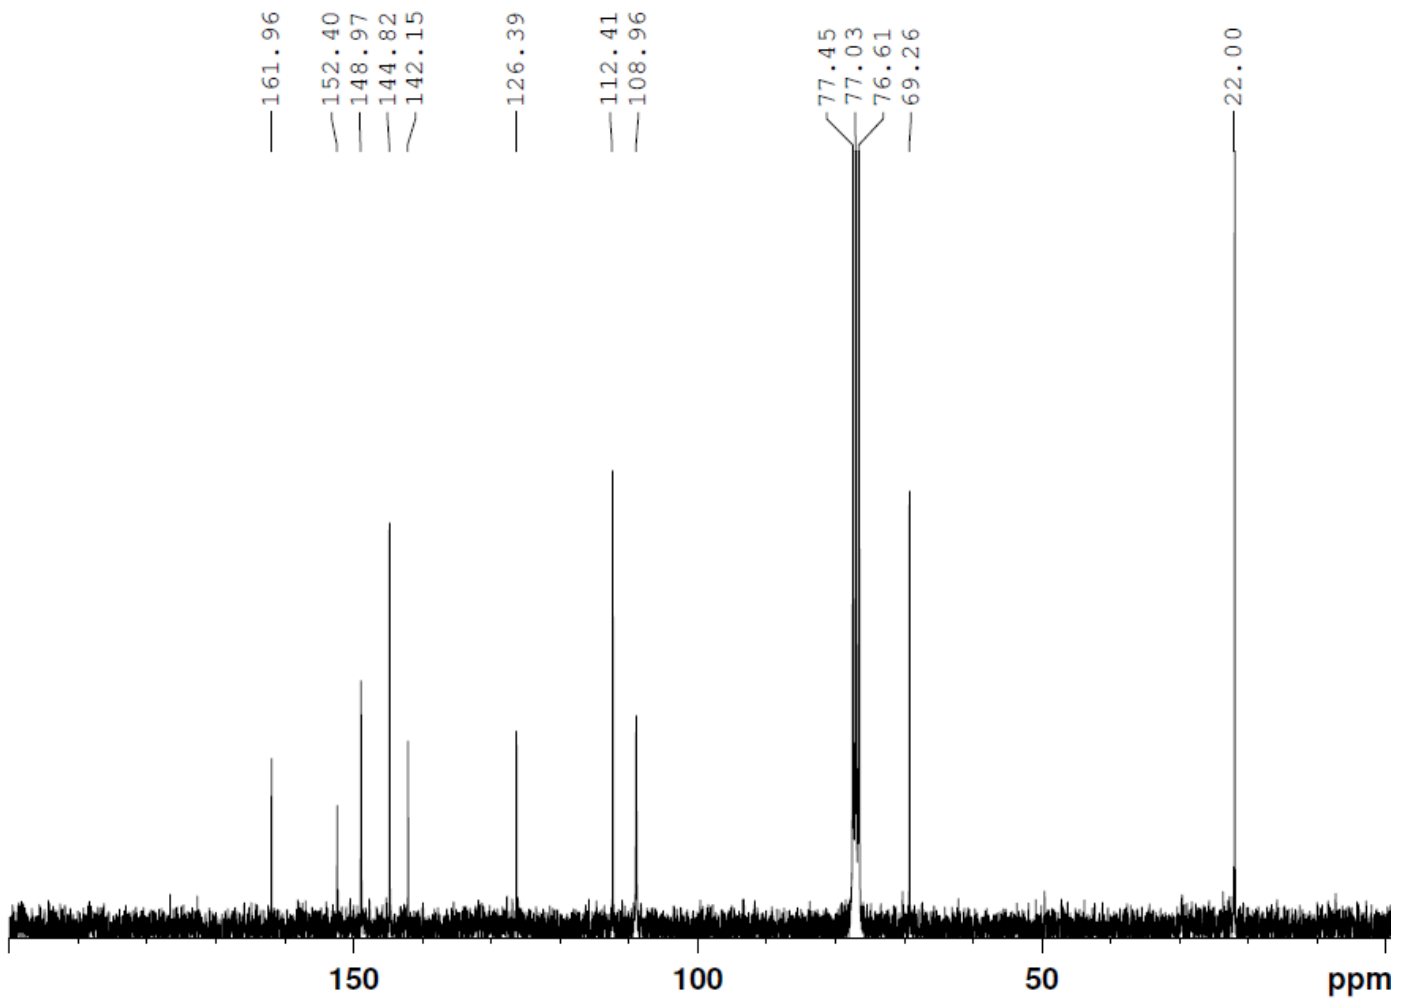

## X-ray Structural Analysis for 3-ISOPBC (2)

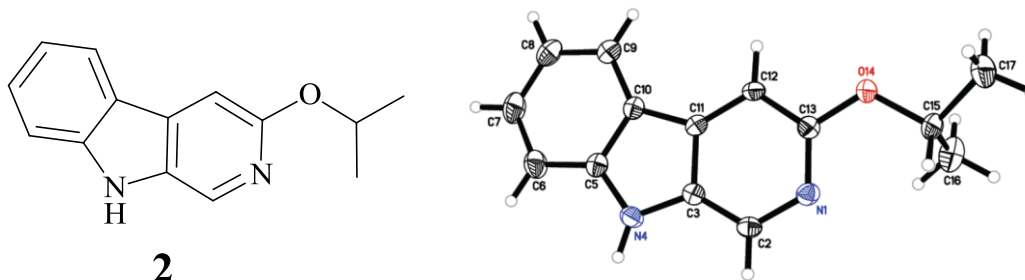

**Figure S1:** Results of the X-ray diffraction study on 3-isopropoxy-9*H*-pyrido[3,4-*b*]indole (**2**) showing one of the two molecules in the asymmetric unit. Displacement ellipsoids are at the 50% level ( $\beta$ -carboline numbering not followed)

Crystal Data for compound **2**. The 0.682 x 0.479 x 0.253 mm<sup>3</sup> crystal was monoclinic in space group  $P 2_1$  with unit cell dimensions  $a = 9.1046(2)$  Å,  $b = 10.2134(2)$  Å,  $c = 19.7287(5)$  Å, and  $\beta = 90.6870(10)^\circ$ . Data were 99.1% complete to  $29.15^\circ$   $\theta$ . CCDC 1040832 contains the supplementary crystallographic data for this paper. These data can be obtained free of charge from The Cambridge Crystallographic Data Centre via [www.ccdc.cam.ac.uk/data\\_request/cif](http://www.ccdc.cam.ac.uk/data_request/cif)

### X-ray Structural Analysis for 3

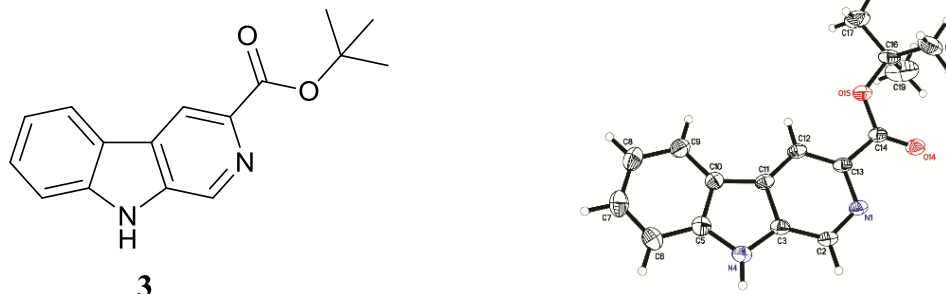

**Figure S2:** Results of the X-ray diffraction study on *tert*-Butyl 9H-pyrido[3,4-*b*]indole-3-carboxylate (**3**) showing one of the two molecules in the asymmetric unit. Displacement ellipsoids are at the 50% level, solvent has been omitted for clarity ( $\beta$ -carboline numbering not followed)

Crystal Data for compound **3**. The 0.416 x 0.374 x 0.277 mm<sup>3</sup> crystal was monoclinic in space group C 2/c with unit cell dimensions  $a = 16.0850(12)$  Å,  $b = 15.4499(15)$  Å,  $c = 25.045(2)$  Å, and  $\beta = 101.694(4)^\circ$ . Data were 99.9% complete to  $29.17^\circ$   $\theta$ . CCDC 1044936 contains the supplementary crystallographic data for this paper. These data can be obtained free of charge from The Cambridge Crystallographic Data Centre via [www.ccdc.cam.ac.uk/data\\_request/cif](http://www.ccdc.cam.ac.uk/data_request/cif)

## X-ray Structural Analysis for 9a

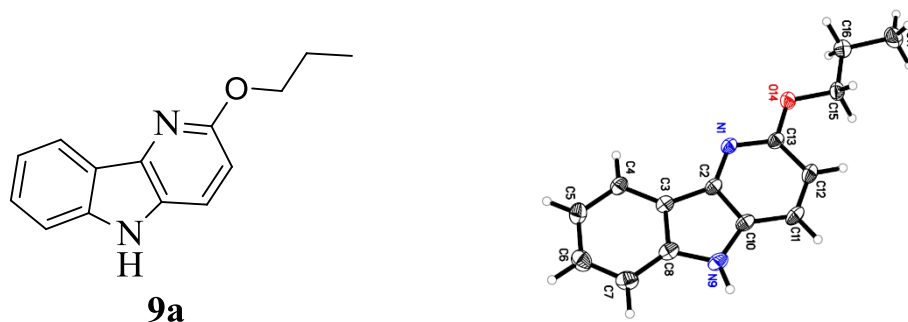

**Figure S3:** Results of the X-ray diffraction study on 2-propoxy-5*H*-pyrido[3,2-*b*]indole (**9a**) showing one of the two molecules in the asymmetric unit. Displacement ellipsoids are at the 50% level ( $\beta$ -carboline numbering not followed)

Crystal Data for compound **9a**. The 0.554 x 0.459 x 0.204 mm<sup>3</sup> crystal was orthorhombic in space group  $P 2_12_12_1$  with unit cell dimensions  $a = 14.2584(5)$  Å,  $b = 14.3343(5)$  Å,  $c = 11.7845(4)$  Å, and  $\beta = 90^\circ$ . Data were 99.8% complete to  $29.165^\circ$   $\theta$ . CCDC 1040833 contains the supplementary crystallographic data for this paper. These data can be obtained free of charge from The Cambridge Crystallographic Data Centre via [www.ccdc.cam.ac.uk/data\\_request/cif](http://www.ccdc.cam.ac.uk/data_request/cif)

## X-ray Structural Analysis for 9d

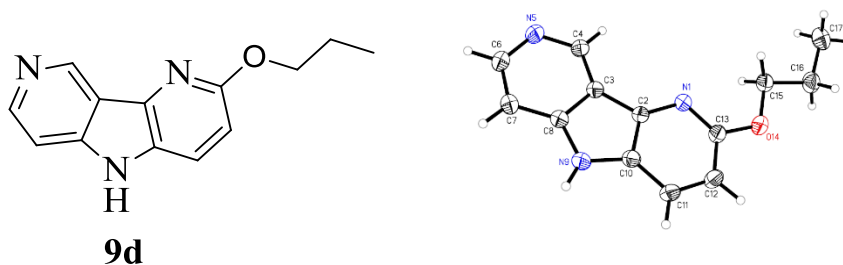

**Figure S4:** Results of the X-ray diffraction study on 2-propoxy-5*H*-pyrrolo[3,2-*b*:4,5*c'*]dipyridine (**9d**) showing the contents of the asymmetric unit. Displacement ellipsoids are at the 50% level. ( $\beta$ -carboline numbering not followed)

Crystal Data for compound **9d**. The 0.46 x 0.08 x 0.02 mm<sup>3</sup> crystal was orthorhombic in space group *F dd2* with unit cell dimensions  $a = 22.476(2)$  Å,  $b = 49.142(4)$  Å,  $c = 4.1392(4)$  Å, and  $\beta = 90^\circ$ . Data were 97.2% complete to 68.03°  $\theta$ . CCDC 1040831 contains the supplementary crystallographic data for this paper. These data can be obtained free of charge from The Cambridge Crystallographic Data Centre via [www.ccdc.cam.ac.uk/data\\_request/cif](http://www.ccdc.cam.ac.uk/data_request/cif)
